# Supplementary material for: Isoform-specific roles for AKT in affective behavior, spatial memory, and extinction related to psychiatric disorders
Source: eLife. 2020 Dec 16;9:e56630. doi: 10.7554/eLife.56630 (PMC7787664; doi:10.7554/eLife.56630)
Supplement: Figure 1—source data 1. [file elife-56630-fig1-data1.xlsx]

## Sheet: AKT1
Genotype	Sex	Center Time	OFA Distance	Open Arm Time	EPM Distance
WT1	M	14.99	5119.52	23.6	1181.01
WT2	M	8.12	5613.72	15.67	1125.84
WT3	M	9.97	5025.71	32.59	1357.08
WT4	M	15.18	4684.54	29.43	1390.93
WT5	M	7.95	5720.85	24.04	1347.91
WT6	M	6.41	3793.7	18.64	1428.22
WT7	M	17.92	4047.59	43.98	1276.65
WT8	M	9.57	6407.28	8.75	2121.52
WT9	M	8.52	5544.2	9.88	1984.25
WT10	M	7.57	5190.18	35.16	2173.81
WT11	M	12.06	5992.42	16.72	1960.35
WT12	M	16.85	5077.71	0.75	2091.67
WT13	M	13.21	4513.14	5.17	2717.29
WT14	M	10.25	5576.71	42.99	1584.96
WT15	M	10.78	5922.06	34.7	1552.88
WT16	M	15.82	3547.14	13.2	1731.97
WT17	M	12.55	4050.37	17.8	2083.22
WT18	M	4.89	3589.14	21.29	1715.04
WT19	M	11.39	3494.1	25.22	2175
WT20	M	3.54	2168.29	2.64	587.13
WT21	M	8.08	3551.61	21.36	1199.58
WT22	M	12.71	3189.92	9.04	1530.56
KO1	M	5.59	6172.88	25.48	2299.86
KO2	M	2.88	5961.39	9.2	2325.5
KO3	M	2.22	5766.68	18.1	2343.5
KO4	M	4.71	5856.56	14.09	1985.17
KO5	M	3.63	6182.23	13	2132.19
KO6	M	4.1	5358.71	5.15	2157.08
KO7	M	5.75	6015.08	25.57	1765.81
KO8	M	4.73	4715.86	2.59	1357.08
KO9	M	8.35	4104.69	41.5	1179.1
KO10	M	3.35	3309.26	2.39	426.74
KO11	M	4.33	3830.52	6.94	627.75
KO12	M	6.12	3884.18	16.63	1289.1
KO13	M	4.09	3913.51	9.56	723.41
KO14	M	4.36	4259.96	4.9	1411.94
KO15	M	7.21	5640.21	9.81	1571.74
KO16	M	5.1	3498.4	16.71	1241.13
KO17	M	13.07	3591.07	9.84	1147.06
KO18	M	13.05	3650.49	8.01	1932.66
KO19	M	6.35	2733.45	28.82	1757.56
KO20	M	6.82	2838.77	9.35	1287.44
KO21	M	8.69	3735.64	11.73	1493.6
KO22	M	6.45	2988.47	5.15	1215.97
WT1	F	6.07	5142.85	6.22	1769.97
WT2	F	5.23	4337.7	34.78	1595.72
WT3	F	23.32	3741.23	11.75	1997.85
WT4	F	14.16	4388.78	29.44	1097.01
WT5	F	8.45	5114.69	19.32	1685
WT6	F	8.35	4218.72	31.29	1674.31
WT7	F	8.1	5682.06	24.72	1437.16
WT8	F	10.56	4424.93	24.32	1859.04
WT9	F	15.05	5767.57	22.21	2008.94
WT10	F	4.96	5517.58	21	1252.76
WT11	F	10.29	3463.53	24.4	1973.06
WT12	F	15.88	3856.62	21.45	1831.62
WT13	F	12.84	3731.99	15.88	1500.83
WT14	F	5.73	3269.91	7.24	2038.95
WT15	F	9.61	3196.36	22	1608.99
WT16	F	10.53	3067.15	7.17	1093.93
KO1	F	9.31	4335.7	29.38	2028.88
KO2	F	8.7	4484.7	32.57	1550.21
KO3	F	10.25	3838.7	23.52	1665.14
KO4	F	13.3	4013.88	35.71	1916.06
KO5	F	3.06	1877.12	16.73	1199.85
KO6	F	11.07	4441.33	20.41	1547.92
KO7	F	7.3	5591.15	14.83	1331.76
KO8	F	17.12	4290.36	8.83	1362.57
KO9	F	5.14	3478.07	11.61	1823.8
KO10	F	10.02	4305.03	27.88	2263.08
KO11	F	9.85	3110.76	11.47	1932.77
KO12	F	11.59	4796.68	27.26	2279.47
KO13	F	8.25	2919.31	15.16	2250.84

## Sheet: AKT2
Genotype	Sex	Center Time	OFA Distance	Open Arm Time	EPM Distance
WT1	M	8.04	4963.26	13.84	1837.12
WT2	M	11.99	5825.12	35.32	1608.45
WT3	M	14.56	5878.89	23.72	1915.14
WT4	M	13.4	5141.42	13.37	1639.48
WT5	M	6.11	5527.81	10.38	1660.78
WT6	M	9.73	5015.64	37.09	1807.96
WT7	M	10.74	5273	7.82	1573.06
WT8	M	6.55	5072.65	25.76	1961.51
WT9	M	8.04	5263.6	2.22	1525.12
WT10	M	13.06	6351.38	20.42	1539.33
WT11	M	14.76	4551.28		outlier
WT12	M	8.53	4961.67	35.02	1504.77
WT13	M	12.2	4063.87	4.55	1515.36
WT14	M	7.65	4698.52	24.28	1594.11
KO1	M	11.37	4307.09	1.4	1832.49
KO2	M	11.42	5237.25	21.49	1592.19
KO3	M	10.05	6235.69	11.5	1784.22
KO4	M	11.21	5593.44	15.45	1845.86
KO5	M	14.07	5337.09	20.24	1617.38
KO6	M	7.6	4700.14	12.77	1838.65
KO7	M	7.02	4674.93	5.31	1878.83
KO8	M	7.71	5818.14	27.09	1944.67
KO9	M	15.59	5290.68	0.87	1912.24
KO10	M	10.34	4308.62	2.81	1607.88
KO11	M	15.65	5528.3	3.89	1871.38
KO12	M	7.56	3796.81	0.47	1087.87
KO13	M	4.06	3896.86	9.2	1869.2
KO14	M	17.19	3600.19		outlier
KO15	M	12.83	5936.21	0.89	1456.14
KO16	M	21.25	4083.47	5.45	1622.51
WT1	F	13.96	4265.21	3.04	1610.44
WT2	F	11.53	4655.44	12.12	1862.59
WT3	F	8.3	5308.19		outlier
WT4	F	7.71	3933.24	5.85	1596.98
WT5	F	16.85	7222.34	14.95	1904.83
WT6	F	14.68	5090.95	29.82	1879.47
WT7	F	8.81	3412.16	22.12	1632.59
WT8	F	8.39	4352.37	6.82	1651.04
WT9	F	13.76	5068.96	12.77	1773.18
WT10	F	17.28	4426.86	32.21	2167.75
WT11	F	9.97	5197.68	8.54	1929.88
WT12	F	7.89	5054.29	4.38	892.13
WT13	F	19.39	4056.07	5.62	755.42
KO1	F	7.11	3613.03	0.1	1176.43
KO2	F	8.58	3325.9	10.95	1642.3
KO3	F	20.6	3869.2	25.64	1911.07
KO4	F	11.33	5258.62	22.28	1585.08
KO5	F	18.59	5277.83	12.9	1955.83
KO6	F	19.66	6056.85	22.39	1867.05
KO7	F	15.62	4924.42	14.37	1896.41
KO8	F	12.51	4808.86	21.43	1286.61
KO9	F	3.69	4299.74	17.75	1808.08
KO10	F	8.4	5042.15	6.86	1068.41
KO11	F	8.53	4941.9	12.81	1489.09

## Sheet: AKT3
Genotype	Sex	Center Time	OFA Distance	Open Arm Time	EPM Distance
WT1	M	4.73	3739.98	28.63	1440.17
WT2	M	7.71	3044.57	24.81	1341.68
WT3	M	6.16	3967.64	20.25	1198.76
WT4	M	4.22	2858.31	12.95	1149.07
WT5	M	12.72	2550.68	25.83	790.99
WT6	M	8.3	4240.79	16.98	1008.9
WT7	M	13.9	3696.58	33.16	837.58
WT8	M	8.23	4248.23	4.2	1232.01
WT9	M	4.11	3994.75	21.79	1486.61
WT10	M	9.38	4842.62	12.82	1623.55
WT11	M	13.14	4650.34	8.71	1634.38
WT12	M	8.94	4347.71	17.51	1507.5
WT13	M	5.95	3985.79	3	1242.8
WT14	M	4.75	4464.46	3.11	1549.55
WT15	M	3.79	3297.02	6.3	1181.7
WT16	M	22.91	3332.99	29.12	1740.53
WT17	M	11.07	3004.18	23.06	1517.29
WT18	M	5.93	2205.54	3.35	714.79
WT19	M	14.19	2375.6	20.31	1306.3
KO1	M	4.09	2958.23	23.93	668.87
KO2	M	3.87	2899.57	7.52	750.25
KO3	M	8.73	2750.6	1.31	607.27
KO4	M	3.35	2818.58	0.2	709.75
KO5	M	5.4	3182.03	10.28	1132.56
KO6	M	8.59	3607.21	15.51	834.99
KO7	M	7.64	4003.53	7.36	1066.22
KO8	M	6.11	3558.91	36.12	938.35
KO9	M	7.31	3565.52	5.34	1132.01
KO10	M	7.1	4115.23	25.28	1303.52
KO11	M	9.19	3956.75	14.3	1597.52
KO12	M	6.83	4099.89	5.63	1332.26
KO13	M	18.79	4873.71	45.87	1335.92
KO14	M	15.6	5534.21	25.38	1565.61
KO15	M	10.19	5151.16	11.64	1235.04
KO16	M	9.78	4657.32	5.7	1748.03
KO17	M	25.13	3166.05	10.82	1727.42
KO18	M	22.31	2407.62	0.98	996.51
KO19	M	11.17	2463.33	36.66	1522.11
KO20	M	10.43	2414.66	3.37	1305.46
KO21	M	14.5	3074.12	26.04	1412.78
KO22	M	6.24	4760.11	14.42	1595.07
KO23	M	22.48	1928.8	21.29	1502.22
WT1	F	10.48	5494.04	7.91	1224.48
WT2	F	15.79	3984.35	16.37	1133.21
WT3	F	34.95	1825.58	16.28	1369.36
WT4	F	6.64	4654.81	18.76	1083.45
WT5	F	11.19	3498.58	14.51	1178.04
WT6	F	10.54	6155.94	7.1	1353.68
WT7	F	7.76	3095.44	8.19	737.65
WT8	F	4.33	3318.95	0.81	531.37
WT9	F	23.78	3403.04		outlier
WT10	F	8.65	3299.24	18.46	1613.89
WT11	F	8.4	3196.69	35.92	1148.41
WT12	F	18.21	2881.55	28.36	1819.5
WT13	F	14.16	2847.74	21.26	2096.06
WT14	F	14.32	3183.73	3.16	1004.4
WT15	F	8.8	2922.69	37.56	1303.29
WT16	F	13.4	2749.86	16.49	1011.68
WT17	F	17.47	4644.32	18.69	1300.06
WT18	F	7.24	2382.63	29.84	1738.65
KO1	F	22.51	4140.96	41.17	1360.06
KO2	F	18.98	3990.91	26.72	1300.28
KO3	F	22.73	4270.2	54.6	907.51
KO4	F	10.05	3424.26	14.7	1108.19
KO5	F	36.95	2494.4	21.84	1481.9
KO6	F	7.21	5119.79	14.91	1262.79
KO7	F	10.73	3883.72	3.79	1347.56
KO8	F	7.82	3642.82	8.56	1149.64
KO9	F	14.09	3534.29	12.59	1234.64
KO10	F	4.82	2697.8	7.51	1453.56
KO11	F	16.17	2434.66	19.74	1576.28
KO12	F	8.66	2518.08	11.72	1260.09
KO13	F	11.92	3366.37	12.02	1524.56
KO14	F	9.92	1820.9	18.27	1099.52
KO15	F	16.73	2967.87	12.09	1127.69
KO16	F	26.28	3606.13	13.22	1705.99
KO17	F	2.47	3003.56	18.24	1485.18
KO18	F	3.52	1404.24	12.78	1876.19
