# Supplementary material for: Isoform-specific roles for AKT in affective behavior, spatial memory, and extinction related to psychiatric disorders
Source: eLife. 2020 Dec 16;9:e56630. doi: 10.7554/eLife.56630 (PMC7787664; doi:10.7554/eLife.56630)
Supplement: Figure 2—source data 1. [file elife-56630-fig2-data1.xlsx]

## Sheet: AKT1
Genotype	Sex	D1	D2	D3	D4	D5	D6	D7	D8	R1	R2	R3	V1	V2	Probe Target Quad Time	Probe Target Platform Crossings	Velocity	Distance
WT1	M	60.0934	34.9933	24.7331	38.9056	34.351	31.5899	44.995	22.4808	31.2396	43.2099	8.00801	27.8195	9.62629	28.3617	3	17.3122	1039.77
WT2	M	60.0934	60.0934	29.0123	13.4885	20.2703	11.6116	8.55856	11.0277	46.6466	38.4301	18.6019	18.7604	8.15816	27.8612	4	14.8323	890.828
WT3	M	43.8856	58.6503	45.2619	43.8856	44.1859	35.8192	25.4504	23.9656	33.8005	17.5259	23.4318	30.4638	7.11545	10.9443	2	14.0682	945.534
WT4	M	51.0594	60.0684	60.0934	50.8091	47.7144	43.1932	30.689	11.8202	36.3447	34.6263	21.1795	15.0817	7.01535	36.9036	5	9.60317	676.717
WT5	M	47.8896	59.009	56.8986	36.8869	34.2009	32.1822	31.6149	27.953	55.0717	32.5576	32.299	13.5969	9.2676	36.8368	5	12.8027	869.531
WT6	M	58.8255	50.3337	34.6263	27.5025	26.0093	17.7928	15.3737	12.4875	36.8368	33.4084	37.5375	10.986	8.31665	16.2162	2	14.964	999.338
WT7	M	60.0934	38.7054	28.8288	15.3403	15.5405	32.0487	20.1618	10.5939	25.0751	31.5399	14.7397	27.9279	7.42409	35.6356	7	12.3148	837.993
WT8	M	60.0517	26.4431	20.1201	28.0697	27.7027	28.687	24.9416	16.3747	57.7494	44.97	19.0524	19.1942	7.43243	21.5883	3	9.21817	486.88
WT9	M	60.0934	43.8689	33.0664	33.4418	22.8812	18.7437	13.4551	8.45012	34.7848	17.2005	14.356	21.8051	14.3727	30.3637	9	11.3468	779.956
KO1	M	49.6663	35.6023	26.71	32.5909	12.1455	22.0804	8.3667	14.039	33.717	36.1612	20.6206	11.0611	10.4688	28.8288	4	14.6577	880.344
KO2	M	60.0934	60.0934	51.5098	39.5812	25.7341	17.9096	18.5102	32.374	17.4341	18.6687	6.47314	13.2716	15.0817	25.4922	3	9.93741	596.841
KO3	M	60.0934	43.9022	48.2316	39.9066	40.4905	20.5956	14.7147	9.43443	57.5659	36.4948	19.1859	15.5239	12.9713	16.5165	2	22.0688	1424.98
KO4	M	60.0934	47.7311	42.6426	33.0414	36.5782	29.5295	23.4985	10.0767	40.1401	33.4418	20.3537	10.1268	7.35736	20.4538	2	10.2591	714.058
KO5	M	60.0934	37.7294	36.2779	31.1144	29.8465	40.332	41.8585	37.8629	53.5452	40.9493	16.8168	15.7074	14.4645	17.6176	1	17.3302	1141.45
KO6	M	57.8078	37.2539	25.2085	19.678	35.8692	14.5145	20.6373	16.3747	52.1522	49.9416	37.0621	17.5926	7.75776	14.6813	3	13.8686	933.551
KO7	M	52.3774	53.1114	48.1899	39.0474	37.6793	25.4671	19.5779	28.6787	56.1728	29.8549	28.7955	14.7314	10.7024	38.1715	1	11.1355	769.401
KO8	M	53.1782	43.6103	29.713	33.1665	40.5906	32.1655	17.3507	13.7971	45.7124	45.6039	17.7344	21.1879	6.13113	19.1141	1	10.6292	622.665
KO9	M	59.4094	50.8759	34.9016	34.5846	37.8378	29.7631	29.5462	21.0961	57.4825	30.8475	29.1208	12.4458	7.37404	21.7551	4	10.6317	735.698
WT1	F	59.96	36.2779	29.9216	39.6647	39.7814	51.9937	37.7294	28.3617	25.9426	7.22389	24.1909	16.2579	10.9943	28.4922	3	9.9383	596.895
WT2	F	60.0934	60.0934	60.0934	29.5796	51.5933	47.9229	27.1021	22.7311	35.7691	19.995	28.3784	14.2309	18.335	21.9219	5	11.0228	662.033
WT3	F	60.0934	57.8412	48.6486	34.2926	30.0717	23.5485	20.8959	16.8669	60.0517	22.7895	19.8782	11.8869	9.25092	31.5983	3	8.35881	600.18
WT4	F	55.0717	45.5038	31.957	21.0377	21.9553	17.3757	10.327	19.1775	37.9046	10.9943	11.8785	21.9553	5.08008	26.8936	4	15.6896	1042.06
WT5	F	60.0934	57.9997	50.342	46.6884	45.5956	40.0901	37.6543	38.0297	35.3937	49.316	42.0754	13.2049	10.5105	16.6834	3	16.9409	1115.37
WT6	F	60.0934	50.5923	60.0934	60.0934	60.0934	60.0851	41.4081	23.4401	44.2776	49.341	28.9206	11.8535	8.35836	27.3941	1	12.3154	840.264
WT7	F	60.0934	59.8015	38.1632	30.8392	29.0457	29.638	17.2089	15.307	49.3827	44.7865	24.1909	12.8295	8.45012	26.0928	1	16.9337	1114.95
WT8	F	50.8592	50.8592	53.5953	46.2713	44.0774	35.1435	31.3647	18.8355	46.4965	51.4348	41.041	15.5072	17.4341	25.0584	3	10.6316	739.133
WT9	F	45.9376	50.2336	45.9376	47.7311	53.2866	39.1808	29.7214	17.701	33.5085	26.4181	23.023	16.8252	6.32299	20.7501	3	14.1716	865.447
KO1	F	42.5842	28.1031	56.5899	39.5145	42.5092	40.4488	60.0934	29.6964	55.8976	48.7905	23.3901	23.5319	8.20821	20.5539	3	14.3439	861.493
KO2	F	46.3297	40.0734	56.5065	42.3173	27.7194	25.5005	56.4231	39.0557	47.1388	35.6523	34.9433	19.3277	7.71605	10.9776	0	12.6792	761.515
KO3	F	60.0934	60.0934	23.5736	55.8308	28.2032	22.3056	19.6029	14.4228	43.7271	16.1245	12.2623	14.8732	7.92459	31.4982	4	16.2214	974.26
KO4	F	59.2176	41.1828	51.4515	32.2739	52.7778	49.2659	44.0607	51.318	59.4595	48.9323	41.8335	46.2045	31.8235	28.9289	2	10.5894	736.603
KO5	F	60.0934	56.2062	36.1695	27.8779	25.2502	31.4648	15.1735	19.3193	38.4301	26.2012	40.699	22.8645	9.98498	22.6894	4	11.1274	766.802
KO6	F	47.2556	38.4635	28.2699	43.1682	38.7971	20.7708	28.4868	30.6473	54.9383	20.9877	16.4831	17.0087	12.0037	31.2312	1	11.4875	790.538
KO7	F	46.3964	52.8529	59.0257	60.0934	36.6867	46.5716	36.3947	27.8529	60.0934	60.0934	59.7431	21.9219	7.63263	34.8682	4	22.1012	1424.78
KO8	F	59.985	40.6323	33.7921	38.2049	24.8248	23.1899	32.6159	26.6016	41.333	28.8705	24.9917	19.3026	8.61695	21.4214	4	16.6082	1096.31
KO9	F	47.9563	40.9576	47.9146	39.9566	40.5739	24.4661	22.1638	18.9106	48.8572	37.9213	15.8075	11.2863	4.75475	36.4364	5	11.3638	783.115

## Sheet: AKT2
Genotype	Sex	D1	D2	D3	D4	D5	D6	D7	D8	R1	R2	R3	V1	V2	Probe Target Quad Time	Probe Target Platform Crossings	Velocity	Distance
WT1	M	60.0934	47.339	42.1588	52.4691	46.2212	11.2362	31.4565	19.3277	40.5656	25.4755	17.3423	27.6693	8.95896	19.7197	4	18.7336	1125.14
WT2	M	60.0184	21.021	37.4124	39.0474	15.8242	24.049	15.7407	14.9816	29.3627	28.8205	15.1318	15.04	10.1685	27.027	7	15.4284	929.462
WT3	M	37.0537	25.1251	20.5289	32.2739	7.21555	25.0334	10.9109	18.8105	46.2045	14.6396	13.4218	11.2029	5.51385	18.7855	3	16.0574	967.242
WT4	M	38.4968	30.4972	17.8345	19.5195	13.6386	41.7918	29.8715	16.1578	15.1818	10.2269	12.3373	16.1078	6.82349	16.9837	3	16.3654	985.509
WT5	M	60.0934	59.8432	59.8515	33.8922	29.3961	18.8188	27.9279	32.1572	29.85	24.9	20.73	20.045	10.5105	31.0644	2	14.9708	880.164
WT6	M	59.8098	46.7551	44.0524	27.6443	36.2112	17.7177	28.1448	49.7164	26.25	17.07	21.26	12.9129	9.80981	11.645	2	15.2867	889.047
WT7	M	59.9183	59.8682	50.7174	30.1802	42.359	28.6203	19.7948	11.6783	29.5	16.9	13.93	9.59293	6.70671	39.039	5	25.6818	1515.03
WT8	M	59.8515	60.0851	56.1812	59.8098	49.0407	45.8625	17.3924	22.047	31.95	21.9	17.77	9.98498	7.14881	31.5315	3	19.6979	1158.74
WT9	M	60.0934	60.0934	59.8932	59.7264	59.6513	59.4011	51.5098	59.376	22.37	14.59	13.66	20.5205	9.88488	25.4922	0	8.89785	523.419
KO1	M	39.3143	42.1338	45.1869	60.0934	24.0991	36.1278	27.8862	32.2322	36.6867	46.9303	39.3727	12.3123	8.22489	19.2526	2	17.6679	1061.13
KO2	M	45.8041	46.1545	33.7671	44.4027	29.4044	32.6243	23.8822	25.8842	40.1818	28.2533	25.5672	18.6353	8.65032	31.9653	4	16.1155	967.897
KO3	M	46.6216	35.7691	12.1622	26.9937	17.4174	6.27294	30.9643	19.7364	18.5435	8.19152	13.2716	13.1965	8.05806	10.9109	2	15.5453	936.08
KO4	M	47.4808	15.6323	18.1765	16.6833	12.9213	22.7644	29.4795	15.1151	60.0934	31.0727	14.9566	12.1288	8.45012	38.5719	9	13.3061	801.482
KO5	M	44.1608	18.9356	12.9129	23.8155	16.0994	9.84318	28.1031	29.1041	28.979	7.5659	12.7044	16.0077	9.20087	27.1605	3	13.3885	806.683
KO6	M	38.697	38.8972	21.8385	17.5425	24.3243	26.3096	26.4515	20.6039	36.6033	17.9263	29.9049	8.74207	8.71705	27.1605	7	13.8142	832.515
KO7	M	29.1792	45.02	24.1241	12.7044	8.73373	12.0787	9.44277	13.2132	38.9556	17.8595	20.9126	16.4498	6.17284	20.5873	1	15.7995	951.754
KO8	M	54.2209	59.8098	59.7264	36.3864	48.6236	31.2145	25.8926	15.015	31.59	21.68	18.75	19.5445	11.3697	27.294	2	19.4604	1148.01
KO9	M	60.0184	59.7347	46.6884	59.7347	46.3547	59.7764	48.3233	59.8265	30.05	23.02	14.84	27.0604	15.9159	5.63897	1	18.0961	1077.8
KO10	M	59.96	59.9016	59.7764	46.9887	53.3116	59.7931	49.6997	47.7477	33.49	21.4	16.77	12.9685	9.15916	25.8926	2	15.8532	928.867
KO11	M	59.9683	59.8599	59.7097	55.8892	46.2796	46.4131	59.7097	49.7164	26.9	18.31	15.35	14.6146	20.679	20.654	1	27.4418	1609.7
WT1	F	60.0934	39.9149	30.9893	28.2533	22.3974	14.8232	25.2085	37.6627	25.342	14.0224	29.6129	9.35936	8.09977	15.4488	2	13.7626	826.581
WT2	F	50.1835	53.32	24.7581	37.696	9.94328	18.043	17.3257	40.4071	39.0807	29.3961	6.72339	32.374	6.4648	14.648	0	13.206	793.156
WT3	F	50.5672	60.0934	51.293	21.2713	21.5799	16.0994	17.7177	10.7357	58.0163	50.8592	33.8338	12.8795	7.31565	35.669	6	12.3584	742.246
WT4	F	60.0934	48.2816	44.3777	42.0504	43.5269	46.9469	20.4621	18.7938	49.2993	42.651	10.1101	23.3066	6.19786	27.0938	2	14.1093	846.466
WT5	F	35.8442	27.1939	36.2946	24.9166	22.8979	23.8238	35.9526	15.966	23.4735	52.4358	42.0754	31.2563	35.7858	10.4104	1	14.959	901.269
WT6	F	21.4298	24.4411	7.0654	25.2502	16.9169	13.7221	15.2319	13.5802	53.0447	14.5479	9.00067	19.0858	8.25826	35.8358	8	16.2833	979.669
WT7	F	34.5429	25.8258	18.1265	43.5602	14.4978	14.3977	15.4404	21.5299	17.7344	37.9796	21.3881	11.0027	9.28428	19.9533	2	15.0804	908.562
WT8	F	51.9853	49.5579	22.0637	22.3807	19.1775	14.014	25.9593	11.7618	23.4651	22.973	16.1995	17.309	9.25926	32.8328	4	14.1027	814.679
WT9	F	27.6109	11.8202	14.2226	26.2012	19.1859	18.1515	19.3944	25.8258	48.0397	34.4761	14.5562	12.4875	8.7671	24.9917	4	15.3252	923.269
WT10	F	49.7915	36.6116	23.1982	28.1448	29.8799	55.8559	29.9216	13.9473	38.0464	36.62	37.6877	9.17584	8.55856	9.34268	1	14.9283	899.427
WT11	F	49.4828	23.3734	18.9356	40.0984	14.4478	23.6987	16.967	18.1598	17.4258	11.7951	8.89222	15.332	13.7638	41.0077	6	15.5408	935.805
KO1	F	50.6506	49.5329	44.6029	37.7995	31.1428	35.7357	27.8562	22.5342	54.4795	51.0594	33.2666	13.6803	15.5739	21.9887	2	14.0175	841.89
KO2	F	53.5068	32.7578	28.1865	29.8549	28.3617	32.3674	14.7231	19.7364	25.1585	13.6053	18.5269	11.0527	13.7971	25.1201	3	16.0891	968.482
KO3	F	60.0934	51.3096	17.701	20.1451	46.2379	23.6987	24.5996	37.354	53.0531	55.3303	36.8368	14.2309	8.35002	27.2546	3	13.9996	843.345
KO4	F	60.0934	47.0304	37.0454	31.8902	38.2549	30.0934	43.7187	28.0781	20.3203	12.2122	9.25926	24.4244	13.1131	30.3617	4	13.8734	836.072
KO5	F	50.71	42.08	41.71	29.38	34.07	32.68	31.57	25.5	39.48	34.5	25	15.4	10.82	19.07	3	14.13	901.52
KO6	F	50.07	42.77	39.68	29.4	23.91	20.46	22.26	19.36	44.78	27.99	25.11	13.53	9.63	13.21	1	15.15	959.31
KO7	F	51.53	41.13	27.45	31.45	22.27	19.75	12.46	13.95	35.93	20.98	18.9	15.06	9.66	35.41	3	14.2	902.29
KO8	F	46.71	41.98	44.27	30.99	42.15	32.6	25.65	35.76	34.15	33.12	30.85	20.76	14.33	18.87	4	15.1	981.48
KO9	F	44.8	38.45	30.98	24.86	27.7	24.15	14.41	19.05	33.71	24.26	24.79	15.93	7.87	27.22	4	14.94	870.27

## Sheet: AKT3
Genotype	Sex	D1	D2	D3	D4	D5	D6	D7	D8	R1	R2	R3	V1	V2	Probe Target Quad Time	Probe Target Platform Crossings	Velocity	Distance
WT1	M	60.0934	47.6513	45.6456	40.0817	29.2059	31.5566	21.2996	25.0734	60.0934	45.5873	35.352	20.8041	13.0964	25.292	2	7.35067	441.482
WT2	M	60.0934	48.7321	36.2529	41.1495	17.6593	13.7137	9.68468	27.0354	29.1208	16.8502	9.01735	23.7946	16.406	15.0817	4	14.3569	862.279
WT3	M	60.0934	36.9453	34.2509	16.4498	48.5485	40.6073	30.5722	17.4258	24.9166	12.0537	15.3904	12.2372	13.8138	48.5485	2	8.59018	515.927
WT4	M	46.5132	37.0787	46.6578	26.8185	16.2385	24.8359	26.5599	8.7532	51.5738	14.9705	11.1	22.6449	5.92815	34.4344	8	14.6607	880.054
WT5	M	60.0934	31.1061	17.4953	27.7945	24.8693	16.0939	36.6811	8.63085	51.863	15.4154	8.26382	11.9119	12.4013	34.0007	5	13.1598	789.905
WT6	M	46.3019	38.8555	13.0019	20.7791	8.88666	47.0804	7.44077	15.1151	49.7053	51.2512	21.4214	14.4144	8.79769	25.2252	3	12.6859	761.448
WT7	M	46.07	39.63	31.68	17	25.54	19.94	19.92	46.19	26.79	9.95	16.91	12.39	12.3	32.51	4	14.95	897.4
WT8	M	46.4	42.21	38.29	38.75	34.53	35	27.69	43.31	20.64	13.8	13.38	11.47	10.15	29.69	2	10.77	646.35
WT9	M	57.25	47.36	39.27	28.29	32.81	27.66	30.28	49.92	35.77	10.16	17.89	12.78	12.49	17.1	3	13.42	805.65
WT10	M	44.7	24.94	27	14.87	22.86	17.41	19.56	47.7	31.94	11.94	16.47	12.5	13.46	27.05	4	14.77	886.91
KO1	M	48.8822	29.5546	9.58458	21.5215	11.7784	19.6029	5.39706	15.9826	21.7634	9.01735	11.1195	19.4928	14.0807	18.4518	1	20.0128	1201.97
KO2	M	20.9543	36.011	25.7925	16.2996	5.33033	16.3997	10.3103	18.8689	27.2439	23.4484	13.6136	11.4865	7.22389	22.8562	6	18.145	1089.79
KO3	M	60.0934	60.0934	60.0934	37.5626	27.3607	42.8762	32.983	6.53153	51.3013	36.62	11.6116	12.9671	12.2894	34.6346	3	12.0456	723.457
KO4	M	60.0934	57.4324	56.9987	48.8405	21.4965	21.338	20.5956	24.5913	37.2706	9.71805	20.5455	10.327	9.67217	27.3607	3	12.9321	776.702
KO5	M	60.0934	59.3677	50.3253	15.7074	26.1178	31.8402	36.8952	23.1398	47.0721	27.8445	12.2372	12.2039	10.4563	24.9917	0	9.01058	541.176
KO6	M	60.0934	60.0934	32.9997	18.2683	8.04137	14.5646	15.8408	27.4358	60.0934	44.2359	9.04237	15.7616	12.402	25.8592	4	18.8812	1134.01
KO7	M	60.0934	60.0934	60.0934	60.0934	60.0934	60.0934	52.1438	60.0934	59.1842	45.362	10.9776	19.0424	10.01	0.834167	0	8.38193	502.86
KO8	M	52.8529	47.8896	47.4641	14.4228	48.6153	16.1578	13.4051	8.31665	30.5138	11.4364	20.6623	16.1812	5.78912	35.669	8	13.8251	829.867
KO9	M	39.2809	15.357	29.1875	29.7464	14.9483	31.0227	21.2629	18.677	44.2526	9.43443	10.1185	15.0984	8.45012	26.4598	5	14.4906	869.834
KO10	M	50.659	16.8252	20.1285	9.90157	14.9483	21.0878	6.68168	13.2466	48.0814	29.7881	13.2549	10.3353	7.34067	24.5579	2	14.7119	883.125
KO11	M	51.5849	43.1849	32.3824	22.7477	21.1044	35.9359	9.69303	16.0994	33.9923	23.7821	18.5102	19.6013	7.42409	36.9036	6	14.1263	847.955
WT1	F	60.0934	35.694	22.1388	23.4568	19.7698	8.75042	27.6276	22.314	33.0497	32.8996	21.4548	13.4301	11.8552	28.028	8	17.2578	1036.5
WT2	F	60.0934	43.7271	20.8458	18.5936	16.3997	12.2145	11.2279	21.3213	30.981	16.1078	13.7721	16.0911	11.3614	41.0744	4	14.9156	895.83
WT3	F	35.3687	22.1221	12.4625	28.0697	28.6954	18.623	21.9386	8.94227	36.1778	9.12579	11.303	11.0694	9.8543	23.3567	2	16.6498	999.988
WT4	F	60.0934	54.7047	60.0934	26.4431	28.1949	26.5432	44.7364	22.5309	48.8989	39.9149	26.026	12.621	6.70671	34.9016	7	14.3026	859.014
WT5	F	60.0934	60.0934	60.0934	60.0934	47.1972	43.5602	37.3123	55.0717	55.1134	36.1278	32.5909	17.676	13.1924	26.8268	3	10.5636	634.448
WT6	F	25.317	28.9373	30.8642	32.4575	46.0961	27.4274	45.1368	16.5249	33.1665	33.4501	25.0417	28.7287	7.60927	23.7571	4	14.2572	855.816
WT7	F	53.8288	22.4308	32.374	46.1628	42.2923	22.0387	18.3851	19.0274	30.5556	14.1308	14.1225	15.357	6.31465	30.2636	7	13.3528	801.5
WT8	F	48.2149	19.019	16.2496	18.8005	13.1965	19.5095	15.7991	9.15916	19.5028	10.3187	8.65866	17.4341	7.62429	41.9419	7	14.2111	853.045
WT9	F	47.9396	41.625	28.2282	23.0981	37.5709	17.8679	14.7397	27.4691	43.7271	7.58258	13.5636	46.6633	27.319	36.5032	4	12.2334	734.269
WT10	F	42.0504	25.8675	32.2155	36.7951	24.3243	11.1862	15.7074	8.74207	45.5122	13.7721	17.4925	9.35936	9.45946	36.1361	3	14.5269	872.014
KO1	F	60.0934	32.3824	17.7928	17.5759	13.5969	17.4591	23.632	11.3113	27.0437	20.362	18.5686	12.354	11.1445	32.7327	3	16.7451	1005.71
KO2	F	55.1718	53.0948	18.7855	10.5522	11.4698	17.1922	12.9546	12.8295	31.1228	9.90991	11.0444	12.304	9.73334	26.1261	8	17.4058	1045.39
KO3	F	60.0934	60.0934	49.5329	26.0844	8.31665	26.0844	18.2599	17.6593	46.1378	21.9553	19.8949	19.301	11.987	30.4972	3	14.7962	888.663
KO4	F	60.0934	53.7621	33.375	35.382	30.1468	28.7871	23.1481	14.4978	26.1762	22.5642	8.70871	21.442	10.0754	22.3891	4	19.8201	1190.4
KO5	F	60.0934	60.0934	28.0531	20.6707	22.6476	14.8315	24.1658	8.55022	23.3483	15.5656	5.38872	10.4327	7.91069	40.4738	5	13.5337	812.837
KO6	F	48.9406	41.5966	38.5219	49.3493	37.2539	36.9203	21.8719	11.1778	55.981	8.24157	7.80781	16.4498	6.79846	28.5953	5	13.6022	816.475
KO7	F	42.0837	23.9406	21.4882	15.7074	10.4104	23.4985	7.64931	10.7441	34.2676	14.2226	10.5189	17.6593	7.05706	40.674	6	14.0372	842.602
KO8	F	54.713	37.1038	41.5832	23.6403	32.0904	21.0627	11.7284	12.5042	51.7935	10.619	10.2186	12.5125	8.61695	38.5052	4	13.9027	834.527
KO9	F	37.0704	35.9493	18.043	19.3777	18.9773	20.0284	17.0254	18.4268	13.2049	18.4685	16.2913	12.3207	8.42509	33.6003	8	14.3757	862.933
