# Supplementary material for: Isoform-specific roles for AKT in affective behavior, spatial memory, and extinction related to psychiatric disorders
Source: eLife. 2020 Dec 16;9:e56630. doi: 10.7554/eLife.56630 (PMC7787664; doi:10.7554/eLife.56630)
Supplement: Figure 3—source data 1. [file elife-56630-fig3-data1.xlsx]

## Sheet: AKT1
Genotype	Sex	Training Pre-CS Freezing %	Training Freezing CS1 %	Training Freezing CS2 %	Context 24 h Freezing %	Cued 24 h Pre-CS Freezing %	Cued 24 h Freezing CS1 %	Cued 24 h Freezing CS2 %
WT1	M	5.37667	24.0167	41.1333	14.0197	27.7558	66.6216	78.2849
WT2	M	0	29.2067	52.2533	51.429	0.3916	48.2449	45.5416
WT3	M	1.33917	17.6367	48.7667	22.003	0	31.4616	38.5016
WT4	M	0	3.51	19.4167	7.94167	11.2608	49.6216	60.4316
WT5	M	2.24	39.3533	48.2933	55.83	17.6983	70.1749	69.3249
WT6	M	5.10167	44.2633	46.59	21.8447	0	58.1316	57.1349
WT7	M	0	0	31.25	7.222	9.7241	47.1016	69.4316
WT8	M	0	0	22.32	26.114	0	50.9916	58.9616
WT9	M	0.4425	2.68	54.46	46.363	0	54.5316	57.1916
WT10	M	0	2.68	42.86	31.795	1.5591	74.8916	68.6916
WT11	M	2.8975	0.88	34.51	10.159	0	20.3216	47.1016
WT12	M	0.44	0	15.18	11.229	0	50.6816	55.1416
WT13	M	1.3325	8.04	41.07	13.276	3.7116	52.4616	78.3516
WT14	M	1.115	0	75.89	45.645	0	42.6416	64.2716
WT15	M	0	8.85	20.35	33.407	22.0116	6.9316	55.1416
WT16	M	Data Corruption			61.966	0	35.9516	64.2716
WT17	M	0.67	5.36	62.5	32.586	5.5066	50.9916	50.1116
KO1	M	0	10.7167	50.57	32.2287	0	61.7116	63.2749
KO2	M	Data Corruption			28.0277	0	65.0049	69.4416
KO3	M	Data Corruption			30.7713	0	65.2183	68.7983
KO4	M	0.675833	5.33333	22.0967	16.095	0	61.6616	25.0816
KO5	M	0.8825	6.23333	2.68	21.502	1.5941	29.7083	61.5683
KO6	M	0.219167	17.8767	40.0633	7.413	0	60.0749	66.0483
KO7	M	0.225	10.81	32.6233	10.7827	2.93327	40.3049	59.9116
KO8	M	0.4425	0	14.68	16.77	0	45.6816	37.7216
KO9	M	0	0	32.11	29.575	0	53.6516	70.4616
KO10	M	0.22	6.25	50	39.237	0.6241	63.1816	64.0716
KO11	M	0.22	9.82	61.61	14.627	0	58.9616	53.6516
KO12	M	0.4475	11.5	47.79	27.15	0	53.3516	34.6016
KO13	M	0	0.89	14.29	9.533	0	30.1416	32.8216
KO14	M	1.1125	0.88	4.42	1.606	0	0	64.0716
KO15	M	0	15.18	43.75	18.797	0	73.8916	77.4616
WT1	F	0	33.93	32.74	52.7554	13.1116	35.9516	64.2716
WT2	F	0	16.81	38.94	42.553	7.7716	59.8416	51.8816
WT3	F	0.2225	8.04	23.21	16.828	37.2016	63.3816	81.9716
WT4	F	1.3325	25.89	8.33	22.4825	17.3746	65.8516	64.0716
WT5	F	0	1.79	4.46	19.773	4.2391	44.8016	81.9716
WT6	F	0	19.47	44.64	40.092	0	40.8516	56.0316
WT7	F	0	1.77	55.36	17.449	0	62.2816	50.6816
WT8	F	0	16.81	38.94	42.553	7.7716	59.8416	51.8816
WT9	F	0	16.57	34.9	29.09	0.8816	50.7316	66.9716
WT10	F	0	19.47	44.64	40.092	0	40.8516	56.0316
KO1	F	0	14.16	55.75	25.894	7.7991	66.0416	70.4616
KO2	F	0	17.86	27.43	19.509	0	51.5716	48.0016
KO3	F	0	2.68	28.32	16.092	0	56.0316	69.4316
KO4	F	0	19.64	29.46	20.629	9.7316	56.3016	80.2016
KO5	F	5.785	29.46	68.75	15.497	0	56.0316	63.1816
KO6	F	0	27.43	43.75	38.659	0	48.8916	78.3516
KO7	F	0	21.24	14.29	39.607	0	33.7116	58.7116
KO8	F	0	14.16	55.8	25.89	7.8016	66.0416	70.4616
KO9	F	0	19.64	29.46	20.629	0	56.3016	80.2016
KO10	F	0	21.24	14.29	39.607	0	33.7116	58.7116
Data Corruption:
unable to retrieve video file but tones, lights, and shocks all occurred normally
usually due to HD becoming full during recording

## Sheet: AKT2
Genotype	Sex	Training Pre-CS Freezing %	Training Freezing CS1 %	Training Freezing CS2 %	Context 24 h Freezing %	Cued 24 h Pre-CS Freezing %	Cued 24 h Freezing CS1 %	Cued 24 h Freezing CS2 %
WT1	M	0	2.68	18.7267	27.3383	7.76029	65.2336	44.8703
WT2	M	0	0.88	20.35	23.85	4.08029	67.4703	58.3203
WT3	M	0	0	15.18	16.572	0.250288	65.4703	74.4003
WT4	M	0	0	0	12.731	0	50.2903	69.9303
WT5	M	0.2225	1.79	22.32	24.808	0	37.3803	62.1603
WT6	M	0	10.71	38.39	30.477	0	59.2203	81.5403
WT7	M	0.8875	21.24	44.25	49.794	0	10.1103	36.0003
WT8	M	0	11.5	41.59	31.171	0	46.7203	65.4703
WT9	M	0.2225	0.89	16.96	16.902	0	55.9603	68.3503
WT10	M	0	8.04	23.21	34.133	0	48.0003	60.3903
WT11	M	0	23.01	68.14	9.01	0	61.0003	66.3603
WT12	M	0.4425	7.96	30.97	18.442	0	16.3603	64.5703
WT13	M	0	8.93	43.36	33.022	0.257788	39.5703	42.2503
WT14	M	0	1.79	12.5	5.794	0	1.18029	36.9003
KO1	M	0	2.65	6.19	12.655	6.54029	49.7703	47.6103
KO2	M	0	0	19.82	3.474	0	39.5703	47.6103
KO3	M	0	2.68	16.96	15.846	0	73.5003	61.0003
KO4	M	0.2225	0.89	14.29	24.674	0	50.6503	79.8603
KO5	M	0	7.14	16.07	27.527	10.5103	57.7303	48.0003
KO6	M	0	6.25	53.57	2.41	0	58.3203	59.2203
KO7	M	0	0	9.82	3.653	0	46.2303	71.8903
KO8	M	0.4475	2.65	23.89	17.635	0	45.8203	57.4303
KO9	M	Data Corruption			10.603	0	36.0003	35.1103
KO10	M	Data Corruption			20.859	0	64.5703	52.9703
KO11	M	0.89	7.96	5.31	4.645	0	70.8203	73.5003
KO12	M	0	0	23.21	14.877	0	39.1503	60.3903
KO13	M	0.4425	9.82	30.36	3.556	0	42.6903	75.4303
KO14	M	0	1.77	15.31	13.274	0	28.8603	74.4003
KO15	M	0	4.42	38.05	19.851	0	28.8603	47.6103
KO16	M	0	0	13.27	33.521	5.56529	52.9703	53.8603
WT1	F	0	9.82	28.57	46.312	0	63.9303	73.6603
WT2	F	0	3.57	46.02	31.609	0	61.9003	83.3203
WT3	F	0	5.36	16.96	17.055	0	61.9003	71.7203
WT4	F	0	12.5	18.75	23.355	0	20.8203	53.8603
WT5	F	0	20.54	24.07	20.9125	0	23.5003	50.2903
WT6	F	0	11.61	19.64	15.825	34.7433	56.5403	73.5003
WT7	F	0	4.38667	35.3733	22.1977	0	18.887	40.437
WT8	F	5.98583	11.62	36.3933	27.8147	0.950288	50.9603	68.8636
WT9	F	Data Corruption			25.7923	14.2686	72.467	80.5736
WT10	F	0	0	50.31	34.0393	0	33.9403	55.5403
WT11	F	0	2.68	33.635	25.5472	0	47.9203	63.6303
KO1	F	0	16.96	51.175	38.167	0	57.4303	54.7503
KO2	F	0	13.39	32.415	26.954	7.58529	73.6603	88.7103
KO3	F	0	5.36	21.35	11.322	0	63.6803	83.3203
KO4	F	0	3.57	20.48	27.781	2.28779	42.2503	40.4703
KO5	F	1.105	10.71	30.84	4.45	0	28.8603	51.1803
KO6	F	0.895	0	7.965	4.731	0	32.9503	54.1903
KO7	F	0	39.29	24.105	29.485	46.6978	29.7503	53.8603
KO8	F	0	0	4.88	9.441	0	61.2703	73.6603
KO9	F	0	0	4.90833	19.1303	5.09362	50.3203	53.7836
KO10	F	0	26.34	28.26	28.2195	27.1415	51.7053	71.2853
Data Corruption:
unable to retrieve video file but tones, lights, and shocks all occurred normally
usually due to HD becoming full during recording

## Sheet: AKT3
Genotype	Sex	Training Pre-CS Freezing %	Training Freezing CS1 %	Training Freezing CS2 %	Context 24 h Freezing %	Cued 24 h Pre-CS Freezing %	Cued 24 h Freezing CS1 %	Cued 24 h Freezing CS2 %
WT1	M	0.2225	15.17	33.74	34.849	0.206694	43.7617	68.7617
WT2	M	0	0.445	27.9	46.427	0	41.0817	47.3317
WT3	M	0	7.995	29.705	26.456	0	48.2217	72.3317
WT4	M	0	8.42	31.185	32.077	1.06919	27.6817	60.7217
WT5	M	0	4.89	51.15	23.137	1.95419	60.7217	87.5117
WT6	M	0	0.445	2.665	10.432	3.31419	50.9017	66.9717
WT7	M	0	0	23.99	15.449	0	18.7617	50.0117
WT8	M	0	1.34	17.855	19.525	0	55.3617	60.7217
WT9	M	0	13.395	35.71	62.245	5.77669	19.6517	58.3417
WT10	M	0	5.78	32.095	10.604	0	49.1117	60.7217
WT11	M	0.4425	3.57	32.145	17.071	0	29.4717	55.6917
WT12	M	0	0	12.915	12.716	0	46.4317	62.5117
WT13	M	0	0	13.73	2.409	0	59.8317	53.5817
WT14	M	0	0	8.475	16.874	7.52169	64.2917	66.9717
WT15	M	0	19.065	50.385	13.86	0	42.8617	43.7617
WT16	M	0	2.63167	27.8683	2.12	0	35.595	61.5317
WT17	M	0	10.29	36.07	24.7773	0	24.0017	51.0517
WT18	M	0	10.6567	31.555	43.6443	0	62.6217	67.6984
KO1	M	1.115	34.17	61.33	27.14	0	33.0417	66.9717
KO2	M	0.67	8.445	45.81	36.864	0	11.6117	55.3617
KO3	M	2.4575	28.015	45.315	35.952	1.08919	56.2617	86.6117
KO4	M	0	5.35	29.37	12.282	4.61669	69.6517	42.8617
KO5	M	Data Corruption			55.537	13.8167	52.1517	75.1617
KO6	M	0.885	26.15	56.04	39.182	18.9392	53.0317	61.8817
KO7	M	1.3325	16.86	19.085	35.146	0	36.6117	53.5817
KO8	M	Data Corruption			52.631	31.3792	76.9317	79.5817
KO9	M	0	2.68	17.41	52.339	2.40919	29.4717	69.8517
KO10	M	0	3.54	22.665	13.984	0	25.9017	52.6817
KO11	M	0	0	19.195	31.055	0	59.8317	62.5117
KO12	M	0	9.745	38.665	17.464	0	28.5817	30.3617
KO13	M	0	0	25.745	15.057	0	2.68169	50.9017
KO14	M	0.4425	0.895	22.72	11.212	0	23.2217	33.9317
KO15	M	0	3.55	13.315	7.042	0	54.4717	50.9017
KO16	M	2.88	7.53833	32.4083	34.054	0	27.605	47.235
KO17	M	0.8775	0	45.4233	6.42267	0	40.905	64.3284
KO18	M	0	18.5617	57.7883	28.105	0	60.1817	91.095
KO19	M	0	11.5683	17.8517	48.712	9.14169	24.3817	53.4684
KO20	M	1.57667	22.9383	43.6583	37.698	1.12919	47.8517	53.7517
WT1	F	0	0	15.47	3.40233	0	54.0384	50.3384
WT2	F	0	4.91	22.32	2.229	0	48.2217	72.3317
WT3	F	0.89	20.92	46.665	36.31	9.97419	66.0817	79.4717
WT4	F	2.01	12.86	38.73	20.41	0	41.9717	48.2217
WT5	F	2.2125	26.785	25.89	40.779	0	58.0417	75.9017
WT6	F	0	0	29.45	26.01	0	64.2917	73.2217
WT7	F	2.2325	27.165	39.135	32.107	0	42.4117	52.1517
WT8	F	0.8925	16.515	37.945	22.71	0	59.8317	63.4017
WT9	F	0	0	7.98	6.232	0	5.36169	44.6517
WT10	F	0	0	5.805	5.421	0	25.9017	60.7217
WT11	F	0	0	0.445	12.044	0	36.6117	66.9717
WT12	F	0	4.425	30.25	26.063	0	21.4317	52.6817
WT13	F	0	8.865	37.68	5.867	0	15.8617	51.2617
WT14	F	4.90167	30.1917	45.0333	15.769	0	42.655	78.6484
WT15	F	0	3.15333	33.89	17.8733	0	23.0284	65.9384
WT16	F	0.450833	1.755	25.13	12.3143	0	13.5917	54.1317
WT17	F	0.450833	6.67333	34.825	48.885	0	46.2417	72.225
KO1	F	0	13.3	37.35	52.743	53.7192	42.8617	76.7917
KO2	F	0	5.78	28.525	57.474	17.6092	33.0417	42.8617
KO3	F	0	16.965	47.77	5.594	0	28.5817	44.6517
KO4	F	0	1.325	39.95	58	2.88419	47.3317	65.1817
KO5	F	0	14.285	45.985	23.577	0	46.4317	66.0817
KO6	F	0	0	4.425	2.849	0	72.3317	75.0117
KO7	F	0.4475	16.955	62.725	16.2725	24.5057	54.4717	53.5817
KO8	F	0	19.59	61.495	24.9525	40.2747	37.5117	64.2917
KO9	F	0	2.21	11.515	13.436	0	41.0817	68.7617
KO10	F	1.11	0	0	2.855	0	0.901694	45.5417
KO11	F	0	11.505	13.755	24.375	0	48.6117	57.4617
KO12	F	0	1.77	7.52	3.031	0	25.9017	49.1117
KO13	F	0	1.35167	27.1817	5.887	0	22.9617	44.5817
KO14	F	Data Corruption			34.8917	0	5.46169	57.0517
KO15	F	0	12.5167	32.5383	4.73233	0	43.8217	63.285
KO16	F	0	13.0033	30.1217	45.04	0	61.505	75.045
KO17	F	0	7.20667	22.7583	24.3413	0	34.505	64.375
Data Corruption:
unable to retrieve video file but tones, lights, and shocks all occurred normally
usually due to HD becoming full during recording
