# Supplementary material for: Isoform-specific roles for AKT in affective behavior, spatial memory, and extinction related to psychiatric disorders
Source: eLife. 2020 Dec 16;9:e56630. doi: 10.7554/eLife.56630 (PMC7787664; doi:10.7554/eLife.56630)
Supplement: Figure 4—source data 1. [file elife-56630-fig4-data1.xlsx]

## Sheet: AKT1
Genotype	Sex	D1 Pre-CS Freezing %	D1 CS1-5 Freezing %	D1 CS6-10 Freezing %	D1 CS11-15 Freezing %	D1 CS16-20 Freezing %	D2 Pre-CS Freezing %	D2 CS1-5 Freezing %	D2 CS6-10 Freezing %	D2 CS11-15 Freezing %	D2 CS16-20 Freezing %	D3 Pre-CS Freezing %	D3 CS1-5 Freezing %	D3 CS6-10 Freezing %	D3 CS11-15 Freezing %	D3 CS16-20 Freezing %	Extinction LTM pre-CS freezing %	Extinction LTM CS1 freezing %	Extinction LTM CS2 freezing %	Renewal pre-CS freezing %	Renewal CS1 freezing %	Renewal CS2 freezing %
WT1	M	25.5629	65.1246	69.7879	65.3053	71.7354	42.0117	65.891	70.7277	68.567	63.0817	47.74	63.7446	60.302	53.5733	55.59	4	72.32	69.64	13.54	83.93	56.25
WT2	M	0	74.7166	77.7093	77.1839	71.6221	18.7717	63.491	47.4083	60.235	63.6817	17.34	56.6886	60.2306	69.7233	59.865	1.56	30.36	46.43	4.9	74.34	50.44
WT3	M	0	70.4866	68.5779	74.7799	72.6404	15.1142	66.1717	70.6717	68.873	59.1108	25.4641	58.354	63.2093	60.3826	58.615	4.24	69.03	46.9	8.22	62.5	88.39
WT4	M	0	62.2319	41.7193	56.0393	56.5671	0	46.3037	40.6563	42.4163	27.6392	50.8633	46.3193	43.6066	49.2353	11.3608	0.66	1.79	11.61	1.56	21.24	28.32
WT5	M	10.0354	55.0386	50.4639	49.5213	61.9729	2.25251	57.5877	48.6937	56.2097	53.7992	0	38.822	29.192	44.4786	46.495	2.23	46.02	39.82	9.12	80.53	68.14
WT6	M	24.3604	70.3079	64.3006	66.0313	63.7104	32.4858	71.5903	62.9703	68.139	58.2092	8.28413	47.262	31.0853	32.4753	28.7191	0	33.04	21.43	1.56	59.29	82.3
WT7	M	0	51.5879	52.4779	44.7079	48.0479	0	54.1217	32.5917	15.7017	30.8917	0	12.7033	3.74329	4.62329	9.16329	1.78	2.68	35.47	4.91	16.81	32.74
WT8	M	0	56.4879	62.7479	52.5479	53.5779	0	45.7717	45.8917	46.0817	41.4717	0	41.8733	28.8633	5.06329	21.2533	1.56	11.61	21.96	6.44	18.75	29.46
WT9	M	4.72795	73.7679	74.8379	74.3579	71.9879	9.68168	60.5517	66.2817	56.0717	68.1317	0	64.6133	64.8233	66.9433	65.8233	0.67	29.46	48.67	12.87	89.29	67.86
WT10	M	0	65.8179	55.6279	55.9379	56.4379	0	54.6917	43.7117	37.8517	32.1417	0	44.0833	25.3833	24.8833	27.7333	0.45	0.88	23.01	2.9	76.11	42.48
WT11	M	13.5513	67.7953	62.2713	67.3833	61.5453	0	47.3797	54.4583	41.9177	39.8543	0	40.322	39.7993	21.5013	36.5893	9.1	49.11	34.82	7.995	47.32	64.29
WT12	M	0	61.4886	48.6086	44.9966	41.6013	0	27.7583	13.2177	12.4717	0	0	15.976	0	0	0	1.77	24.11	8.04	0.6675	32.14	25
WT13	M	6.42545	70.0713	64.3186	60.2639	65.3566	14.4867	53.4883	53.7823	51.447	54.331	18.5016	52.554	64.456	59.7146	70.4626	2.22	54.46	46.43	14.92	49.56	49.11
WT14	M	0	65.9973	70.0466	57.3493	56.5093	0	48.6923	56.4797	55.7637	50.0057	0	41.3506	50.462	46.7886	60.9306	4.44	62.5	65.18	15.37	64.29	53.57
WT15	M	0	61.2933	59.0833	54.7359	67.3053	0	53.8517	47.5237	54.5203	49.4003	0	52.1746	50.5673	46.784	45.8586	1.11	53.57	66.07	1.105	41.59	29.2
WT16	M	24.2138	48.8986	43.3646	63.4133	53.6886	16.3417	43.9743	34.7763	30.3297	43.2317	0	34.934	39.7466	10.326	20.0873	45.5925	64.29	40.18	2.665	25	50.89
WT17	M	0	61.8439	62.6493	69.2573	65.7353	0	51.2683	55.2377	64.317	56.9723	0	41.0933	50.3246	52.8053	55.808	20.05	51.79	63.39	27.67	74.34	85.84
KO1	M	0	68.1366	67.1466	73.5133	70.6854	15.8908	46.8063	30.7083	52.335	43.9442	23.0408	62.3266	57.85	51.298	49.6	1.78	52.68	44.64	4.8725	60.71	48.21
KO2	M	0	57.8146	49.0979	55.7946	57.4513	0	40.0597	36.797	40.8843	27.0692	20.1066	24.5786	5.94463	16.57	26.7325	0.89	7.14	15.18	4.0125	56.64	77.88
KO3	M	0	65.3246	66.0966	71.5873	75.3621	0	54.659	44.1523	45.2937	43.4058	0	49.172	41.568	38.7373	35.9933	0.8925	37.17	33.63	2.44	47.32	52.68
KO4	M	0	48.2306	16.9026	12.0533	16.1388	0	20.449	12.5823	16.503	9.56001	0	8.66129	0	0	0	2.215	5.36	5.36	1.3375	19.47	5.31
KO5	M	0	48.2873	47.1879	37.4953	47.1154	17.45	30.2443	30.3457	27.727	33.9942	0	13.8386	27.378	33.176	15.3083	1.7775	29.46	25.89	2.67	15.93	25.66
KO6	M	30.1338	64.9213	50.3606	47.7773	46.6229	3.61001	20.8417	13.8097	20.8183	23.9108	0	41.9946	35.0773	35.5273	31.7183	4.6775	39.29	33.04	2.8975	40.71	11.5
KO7	M	0	53.5153	55.8126	43.2926	55.3288	14.1958	32.739	13.9283	5.72501	36.1258	0	15.02	19.1546	29.6106	35.8683	0.89	5.31	18.58	0.6675	24.78	1.77
KO8	M	0	59.4639	60.1699	60.3686	50.6153	0	42.9743	42.8137	32.9617	36.4037	2.33746	37.1873	30.6146	35.2753	31.838	1.1125	23.01	14.16	2.67	14.29	16.07
KO9	M	0	58.2413	55.4613	59.4159	75.7286	8.55918	49.9137	45.2463	54.0037	46.6357	0	26.152	29.548	29.656	26.574	0.4475	0.88	0.88	2.6675	53.57	40.18
KO10	M	0	58.1166	42.8959	36.5133	49.9419	14.8017	53.0463	17.3897	17.4523	0	0	10.7666	0	0	16.8166	0	0	0	3.125	16.81	18.58
KO11	M	0	51.0479	39.0993	34.3419	28.3219	0	32.4403	14.0423	10.4917	12.1503	20.41	32.2413	9.16329	0	0	0.885	2.68	1.79	5.575	33.63	34.51
KO12	M	0	69.4013	63.7599	69.6619	74.1819	0	60.2017	57.0903	60.0737	58.2003	0	60.6613	61.1686	44.2933	52.094	4.885	58.04	48.21	1.3325	66.96	71.43
KO13	M	0	43.1486	25.7793	23.9113	22.5299	0	25.7997	16.779	16.2523	9.41901	0	11.492	3.44996	0	3.04329	0.22	0	17.86	3.7825	30.36	33.93
KO14	M	0	29.7719	6.52862	0	0	0	7.98701	0	0	0	0	0	0	0	0	0.885	0.89	0.89	2.225	1.79	0
KO15	M	16.0038	72.5886	61.8013	63.6833	62.3999	28.3025	61.8757	51.3677	49.8723	42.709	1.86996	33.2513	40.7186	39.4573	34.5633	1.99	43.75	10.71	0.67	43.36	51.79
WT1	F	16.0154	67.8346	70.8186	68.9079	62.8566	8.81585	66.8183	54.917	52.603	60.5643	21.6141	61.9966	51.5646	57.0046	60.404	0.89	59.82	51.79	19.79	79.46	56.25
WT2	F	22.0021	75.7153	74.5299	70.3066	72.3966	13.3258	59.379	61.901	60.8497	61.6217	0	46.34	64.2546	63.4946	34.2486	2.67	38.05	61.61	7.56	52.68	69.64
WT3	F	0	69.6459	70.5479	71.3253	66.1566	0	62.7177	58.079	43.0203	50.497	19.0883	64.2866	43.884	70.5506	72.8933	1.34	61.95	67.26	9.77	14.16	75.89
WT4	F	3.84795	32.7979	57.6479	60.9479	70.7779	1.83168	41.9517	0.30168	0	3.83168	2.83329	24.9833	36.5533	18.6233	39.9133	0.33	8.02	7.13	6.32	41.83	55.72
WT5	F	0	33.2379	64.1179	62.1479	68.0079	0	49.6217	25.3617	34.1117	39.7717	0	50.1333	47.6033	60.2833	54.9433	3.67	79.47	76.88	6.0225	65.49	42.48
WT6	F	0	63.1739	56.6586	59.6573	49.8259	0	45.0643	52.2377	51.4983	44.9917	0	47.9426	48.5113	46.0173	51.85	0.4475	0	1.79	10.01	31.25	75.89
WT7	F	0	52.9493	59.7546	43.1939	54.7253	0	21.4737	27.587	52.5357	45.8437	0	15.7993	12.566	42.68	26.07	2.4425	55.75	48.67	2.23	17.96	14.16
WT8	F	22.0021	75.7153	74.5299	70.3066	72.3966	13.3258	59.379	61.901	60.8497	61.6217	0	46.34	64.2546	63.4946	34.2486	2.67	38.05	61.61	7.56	52.68	69.64
WT9	F	3.84795	32.7979	57.6479	60.9479	70.7779	1.83168	41.9517	0.30168	0	3.83168	2.83329	24.9833	36.5533	18.6233	39.9133	0.33	8.02	7.13	6.32	41.83	55.72
WT10	F	0	63.1739	56.6586	59.6573	49.8259	0	45.0643	52.2377	51.4983	44.9917	0	47.9426	48.5113	46.0173	51.85	2.4425	55.75	48.67	10.01	31.25	75.89
KO1	F	0	63.8753	65.3266	62.6519	64.7326	2.68585	56.899	62.4563	57.487	61.997	0	39.8266	58.7633	31.86	36.71	1.34	38.94	16.96	1.56	62.5	40.18
KO2	F	0	60.0639	58.7839	59.8213	66.5833	0	48.8757	43.305	44.5937	45.5503	0	38.228	42.2433	33.0453	20.8693	1.34	54.46	35.71	5.98	62.5	50
KO3	F	18.7196	70.5326	74.0039	75.3739	77.6879	20.6558	62.727	62.5323	62.0017	62.8783	6.97913	59.678	65.222	57.5353	56.5633	1.555	72.32	51.79	24.95	40.18	58.41
KO4	F	0	59.4273	58.6226	59.5953	59.0733	9.53751	50.4883	55.577	62.555	51.7637	12.5566	59.1086	63.9493	49.0106	50.75	2.8975	40.71	53.1	3.57	31.86	80.36
KO5	F	0	33.6879	70.5879	63.3579	65.2379	0	42.5817	23.3217	33.0517	2.38168	0	37.2733	34.0333	36.2733	56.6633	1.27	46.28	26.89	20.4725	37.5	81.25
KO6	F	0	55.1459	53.8093	56.3839	62.1166	0	28.771	38.3223	40.5917	44.3903	0	49.4926	50.9873	49.9866	49.37	8.88	71.43	44.64	0.89	53.57	60.71
KO7	F	0	56.4839	60.4379	68.1106	65.4786	0	49.0143	38.0077	52.7123	52.845	0	48.806	46.25	44.3153	62.044	6.01	62.5	50.89	4.69	58.41	69.03
KO8	F	0	63.8779	65.3279	62.6479	64.7279	2.68168	56.9017	62.4517	57.4917	62.0017	0	39.8233	58.7633	31.8633	36.7133	1.34	38.94	16.96	1.56	62.5	40.18
KO9	F	0	59.4273	58.6226	59.5953	59.0733	9.53751	50.4883	55.577	62.555	51.7637	12.5566	59.1086	63.9493	49.0106	50.75	2.8975	40.71	53.1	3.57	31.86	80.36
KO10	F	0	56.4839	60.4379	68.1106	65.4786	0	49.0143	38.0077	52.7123	52.845	0	48.806	46.25	44.3153	62.044	6.01	62.5	50.89	4.69	58.41	69.03

## Sheet: AKT2
Genotype	Sex	D1 Pre-CS Freezing %	D1 CS1-5 Freezing %	D1 CS6-10 Freezing %	D1 CS11-15 Freezing %	D1 CS16-20 Freezing %	D2 Pre-CS Freezing %	D2 CS1-5 Freezing %	D2 CS6-10 Freezing %	D2 CS11-15 Freezing %	D2 CS16-20 Freezing %	D3 Pre-CS Freezing %	D3 CS1-5 Freezing %	D3 CS6-10 Freezing %	D3 CS11-15 Freezing %	D3 CS16-20 Freezing %	Extinction LTM pre-CS freezing %	Extinction LTM CS1 freezing %	Extinction LTM CS2 freezing %	Renewal pre-CS freezing %	Renewal CS1 freezing %	Renewal CS2 freezing %
WT1	M	34.4441	78.3826	79.9479	71.1566	65.4783	8.54908	56.6859	45.4719	56.7579	54.5666	15.6735	58.6315	42.4728	36.6168	29.6543	2.6725	11.61	11.61	4.005	35.4	23.01
WT2	M	15.4724	67.2293	58.6673	59.5439	41.0459	20.0174	46.2826	37.2739	23.0952	48.6246	39.5593	56.3548	33.6828	31.6855	43.3068	1.55	52.68	37.5	1.3275	15.18	15.18
WT3	M	0	72.0759	49.7139	41.3973	38.9506	1.08658	37.4779	10.8446	12.0492	22.3959	0	8.47148	15.6741	8.66548	11.5401	11.5475	50	42.86	1.115	15.18	28.57
WT4	M	0	60.3013	44.7786	51.4346	60.0706	6.38075	41.9679	43.7272	38.3079	39.8772	19.9118	50.3201	37.8968	26.6355	36.9535	7.5475	41.07	10.71	0.2225	10.62	26.55
WT5	M	22.4541	72.5586	72.0853	74.5266	69.2406	12.5849	63.8552	63.0579	55.6186	63.5706	30.971	55.7255	30.2308	17.1661	18.2675	1.11	43.36	38.94	3.1125	34.82	38.05
WT6	M	0	65.4146	68.8853	66.6666	68.7753	2.74075	45.6712	50.2752	39.3046	44.8746	0	31.3695	43.3968	36.1195	34.6008	0.2225	0.88	0.88	2.2225	10.62	27.43
WT7	M	0.549114	59.7339	60.9379	58.4433	59.7466	0	45.9266	44.1072	42.6699	48.3732	0	56.4375	57.6415	55.1468	56.4501	9.365	57.52	59.82	Data corruption
WT8	M	0	58.1026	61.4166	56.1293	68.1839	0	35.1466	34.1346	29.3072	40.6886	0	54.8061	58.1201	52.8328	64.8875	4.67	33.63	58.04	5.1225	44.64	41.96
WT9	M	0	64.8013	62.2073	64.0153	59.6146	0	49.7679	54.1712	54.5292	47.4366	0	49.5861	49.9928	41.5335	49.3055	2.005	15.93	15.04	9.985	42.86	58.41
WT10	M	0	64.6446	54.1433	46.9586	60.4299	3.12658	65.7619	61.6932	58.0092	64.9799	0	37.8608	44.2988	35.3408	30.8421	1.5575	48.67	2.65	5.555	51.79	28.32
WT11	M	0	51.2939	50.2793	59.2066	47.5719	0	39.6252	43.6799	38.8439	45.5426	0	36.5555	35.6501	16.9868	23.6021	0.2225	8.04	9.82	2.225	37.17	53.98
WT12	M	0	63.4646	67.5619	78.2819	68.7659	0	61.1052	62.4172	67.8479	69.2466	0	58.2915	60.2821	64.6681	62.1701	1.33	59.82	58.04	9.7975	62.83	68.14
WT13	M	9.35661	66.4373	64.1713	72.5413	74.0379	19.5791	48.1566	46.8619	59.9446	53.1726	0.559311	52.9048	52.2601	42.8335	45.2181	1.3325	48.21	17.86	9.5875	36.28	45.13
WT14	M	0	46.0759	38.1119	20.1319	19.4026	0	10.3666	11.8599	11.1606	14.7566	0	6.12881	2.95748	6.51814	7.07414	3.5675	6.19	8.85	4.2225	26.79	23.21
KO1	M	0	63.4839	56.2233	66.2719	54.3146	3.35825	49.7159	40.5932	44.1726	37.7479	24.5935	44.5368	34.9588	35.5228	23.5148	0.4425	28.57	20.54	1.555	41.96	66.96
KO2	M	3.04495	67.9739	59.1646	46.7693	43.4033	0	52.2132	31.1186	41.0912	41.3092	22.151	60.0875	43.4735	45.3515	51.2875	1.33	25	36.61	1.3325	41.96	23.21
KO3	M	0.573281	55.2446	51.9766	43.6219	25.7119	9.04741	54.8599	33.3112	33.3426	27.2119	0.755144	53.2088	39.4508	30.8988	33.8195	4.8725	10.71	35.71	5.7875	39.82	66.37
KO4	M	0	56.0346	55.4573	56.8459	72.2233	15.7616	55.7746	49.1599	40.9032	63.4179	33.9818	49.2481	50.2668	41.3255	46.3335	2.67	32.14	40.18	5.33	61.61	67.86
KO5	M	16.6158	80.7959	76.3626	77.4706	68.4819	5.95991	69.1939	65.5052	49.5879	56.6846	17.916	55.8961	33.0275	29.6281	35.6928	4.425	36.61	41.96	3.555	64.29	43.75
KO6	M	0	71.6926	74.2899	71.5606	73.3546	5.09908	62.7699	49.6392	17.7532	35.4719	40.7101	40.1148	38.4561	27.8681	22.8661	0	9.73	2.65	2.45	8.85	19.47
KO7	M	0	57.9513	62.5346	67.8413	64.5313	18.4899	48.1699	53.3779	54.1012	40.7792	12.6568	38.7315	23.2608	16.9828	26.2561	0.4425	4.42	0.88	2.2175	11.61	23.01
KO8	M	0	60.3919	72.6106	57.2726	70.8573	0	63.6312	61.9626	66.5092	56.9706	0	57.0955	69.3141	53.9761	67.5608	1.34	53.1	57.14	8.9175	70.54	53.57
KO9	M	8.82995	33.7479	40.8446	31.7953	32.5259	0	50.4072	40.8919	27.9612	30.1246	5.53348	30.4515	37.5481	28.4988	29.2295	1.33	8.85	11.61	1.115	35.71	26.79
KO10	M	0	70.5253	80.1219	77.9599	73.9453	4.67991	64.5339	71.8112	63.8452	69.7966	0.393478	55.6541	62.6001	52.7908	62.0321	3.1225	13.27	6.19	10.695	58.04	53.98
KO11	M	0	75.6326	80.4206	79.9146	80.5213	1.56241	74.9939	74.0546	78.7206	71.0066	27.6993	65.3981	63.5115	56.0535	69.4155	0.2225	31.86	0.88	3.1225	72.32	30.09
KO12	M	0	52.9306	59.9046	68.6666	72.2079	0	56.6286	61.0959	62.8586	56.0406	0	40.4015	42.3595	50.0275	52.4868	4.6675	50	44.64	3.1125	61.06	66.37
KO13	M	0	67.1273	74.9539	68.4593	66.7033	0	62.3912	59.8812	60.5639	63.5466	0	46.6015	35.4888	40.5515	30.7175	2.8975	18.75	31.25	3.9975	53.1	64.6
KO14	M	0	53.5933	65.9493	63.4173	67.0966	0	51.7166	59.1426	54.5479	61.6552	0	56.3475	49.1635	41.9275	36.3895	3.345	39.82	38.05	0	65.18	75.89
KO15	M	0	49.3873	49.1219	47.6039	61.1226	0	44.3952	44.5112	60.1086	58.7059	0	31.1221	56.4221	44.2848	33.6061	0.4425	42.86	55.36	4.885	65.18	62.5
KO16	M	2.04328	61.9339	73.0806	63.6539	71.9199	16.1991	56.5512	56.6092	59.9939	44.0546	0	34.6115	52.9948	30.7655	69.1688	0.4425	33.93	41.96	Data corruption
WT1	F	16.5949	68.9373	74.3899	71.0426	66.6219	22.5082	73.4092	69.5546	79.2839	67.3066	4.59014	62.4541	43.9015	47.6755	42.2888	3.345	57.52	57.52	21.635	74.11	63.39
WT2	F	0	73.9113	75.5319	78.4259	78.6613	2.51075	68.7586	66.9606	67.6099	64.4992	0	46.7448	44.5735	35.4595	66.9628	3.9925	64.29	78.57	4.91	42.48	67.26
WT3	F	6.71995	72.4119	83.1806	77.4433	84.2046	6.03575	57.7399	65.9412	69.4359	48.9046	0	50.5335	57.4281	49.1061	63.4828	2.4575	11.5	25.66	1.5625	43.36	8.85
WT4	F	0	53.7173	61.3553	62.1519	66.3559	0	20.6792	47.2699	Data corruption		0	30.5048	37.1328	51.4535	46.1381	2.89833	8.96	47.0133	0.6625	61.61	45.54
WT5	F	Data corruption
WT6	F	Data corruption
WT7	F	0	46.7279	40.8279	45.1579	44.1519	0	56.5099	65.8566	58.8479	75.8719	0	27.8028	33.3455	53.0981	61.3388	8.39167	54.0533	64.1567	16.47	43.6	67.0667
WT8	F	0	63.6866	53.4559	54.6986	59.0353	0	27.7152	14.3852	13.7372	17.4959	0	26.6415	17.2235	28.3055	23.3875	2.45417	46.47	55.5467	0	38.4767	67.8033
WT9	F	0	76.0199	66.4006	51.8853	58.3193	0	45.0359	54.0726	37.0512	43.4339	0	34.5268	45.5021	52.5915	44.8168	1.345	55.2867	53.6033	3.13	56.0733	60.7367
WT10	F	0	42.3179	66.4899	59.3873	56.9226	0	43.4412	54.1879	50.8912	70.4939	0	32.4248	24.9241	42.6581	62.0228	0.876667	48.7433	38.3833	5.99833	44.62	59.8167
WT11	F	0	57.3649	74.8353	68.4153	70.5636	0	50.5906	60.0646	60.1636	59.6992	0	41.4791	41.1761	45.8821	62.7528	1.66708	30.1217	32.0217	3.78042	43.99	34.3333
KO1	F	4.11078	80.0326	58.1306	71.9713	78.1646	18.9457	71.1346	75.6666	66.1732	67.2312	0	63.2241	69.7508	70.0255	73.0621	2.875	58.04	62.5	17.5925	67.26	83.19
KO2	F	12.3383	84.2859	84.5746	79.1739	83.0153	0	66.0659	73.1432	69.5699	61.0906	0	40.9835	44.6875	28.0048	38.0355	2.01	10.62	18.58	0.4425	50.89	61.61
KO3	F	0.559948	75.1626	74.1326	82.6306	82.6446	0	73.8792	59.7126	64.8559	73.2572	10.1201	73.2608	76.7968	65.9521	78.0061	0.4425	35.71	54.46	0	31.86	44.25
KO4	F	12.5399	65.2946	58.6333	47.3639	43.3946	29.8574	54.5472	44.9546	51.8119	46.5532	5.49014	41.1808	39.8648	35.5975	25.1908	12.0475	75.22	72.57	10.7025	46.02	62.83
KO5	F	Data corruption
KO6	F	0	24.9819	60.6386	53.0139	59.0319	0	7.79191	24.3252	21.9352	45.6092	0	0	6.15281	4.75814	19.4141	1.79	36.4167	1.75333	2.895	53.98	24.78
KO7	F	3.57245	44.2519	68.5773	54.4193	60.8046	0	42.8159	67.3452	Data corruption		0	39.6901	35.9635	37.2275	44.9401	7.5575	70.9333	63.92	26.7275	87.5	66.96
KO8	F	0	31.9906	66.0553	58.3913	65.4833	0	13.4052	32.3039	35.6112	49.6359	0	21.0028	41.3301	35.5208	30.0648	1.11417	33.76	16.8333	11.6	58.41	29.2
KO9	F	0	57.4659	53.1046	44.9679	51.6493	0	23.1879	30.5746	37.7392	38.4772	0	26.1661	37.4895	49.3348	47.0855	7.41417	51.4	49.9767	0	41.6567	36.25
KO10	F	0	64.2689	76.5759	66.7966	71.9099	0	54.4409	70.2442	69.5699	61.0906	0	40.3368	40.3255	32.6161	41.4878	4.78375	40.7767	41.25	13.585	69.195	64.285

## Sheet: AKT3
Genotype	Sex	D1 Pre-CS Freezing %	D1 CS1-5 Freezing %	D1 CS6-10 Freezing %	D1 CS11-15 Freezing %	D1 CS16-20 Freezing %	D2 Pre-CS Freezing %	D2 CS1-5 Freezing %	D2 CS6-10 Freezing %	D2 CS11-15 Freezing %	D2 CS16-20 Freezing %	D3 Pre-CS Freezing %	D3 CS1-5 Freezing %	D3 CS6-10 Freezing %	D3 CS11-15 Freezing %	D3 CS16-20 Freezing %	Extinction LTM pre-CS freezing %	Extinction LTM CS1 freezing %	Extinction LTM CS2 freezing %	Renewal pre-CS freezing %	Renewal CS1 freezing %	Renewal CS2 freezing %
WT1	M	0	54.1137	52.3063	53.4263	47.3217	2.67586	60.7902	56.9409	62.5735	50.0615	0	15.3154	17.2221	26.8381	38.5974	0	39.0675	61.3875	5.58105	50.2985	62.7985
WT2	M	28.9513	74.293	76.2477	72.1497	76.161	16.7059	55.4142	58.9309	60.6535	61.1562	5.80826	41.6594	46.0554	37.3928	47.8381	5.75249	45.3175	56.0375	34.701	27.0785	69.0485
WT3	M	18.1513	81.931	80.8603	70.4717	61.0063	15.0459	79.2022	72.2702	73.3935	64.5222	17.3483	68.5588	58.6961	46.4294	39.5321	3.52999	48.8875	65.8575	0	30.6585	52.0785
WT4	M	0	69.1377	72.785	66.0423	58.4937	0	60.5289	55.7782	55.4422	49.7855	3.79826	61.2954	51.0821	58.6161	50.7774	5.55499	52.8075	54.5775	6.46105	44.9385	49.4085
WT5	M	15.6747	76.2417	69.7883	54.813	64.8657	2.26169	60.8335	46.7502	52.0082	37.7742	52.0974	57.0708	42.5048	25.1881	20.3901	4.87499	66.9675	56.3475	0	47.6185	52.9785
WT6	M	0	50.3143	51.8937	45.3117	41.913	0	45.2522	46.4769	42.4969	51.6682	0	45.7934	38.1981	23.5528	29.8428	25.5525	76.5675	57.8175	0	0	0
WT7	M	3.71384	59.0017	47.4703	48.679	61.6323	0	45.9869	50.7049	44.7509	48.9755	0	55.0881	48.1368	52.9061	56.1028	3.07499	53.6975	39.5375	0	59.2285	63.6885
WT8	M	0	61.9843	58.9297	60.031	65.061	0	53.2229	63.6542	51.7955	61.6969	0	48.7474	52.7234	55.0868	66.3301	0	14.7575	51.9275	0	43.1585	20.8285
WT9	M	5.50384	54.2257	55.7583	51.989	47.1617	0	63.7215	64.8675	69.5762	72.5449	0	45.1401	51.0808	50.5681	48.1841	19.7825	71.3975	57.2375	35.216	65.6485	77.1585
WT10	M	0	60.803	62.4143	64.0797	69.6083	2.30336	45.3469	42.0982	44.3309	30.9462	0	52.4708	69.4541	82.7974	77.7008	0	34.2275	34.2275	0	30.6585	61.0085
WT11	M	0	45.729	48.4323	47.3403	44.815	3.93919	47.9002	58.0015	60.9369	61.2789	0	35.5468	41.2288	30.9288	44.6568	0	43.9575	42.1875	0	55.9185	28.4785
WT12	M	0	44.7777	58.1803	60.4283	65.563	13.2617	46.5555	54.2742	51.1455	51.2082	0	38.2528	47.4681	60.2414	61.7468	0	37.2875	47.1075	0	0	25.8285
WT13	M	0	55.6823	56.047	51.315	64.7237	0	20.9709	17.6522	20.7482	62.9182	0	18.1794	7.49209	13.0014	24.0781	0	0	0	0	0	0
WT14	M	0	53.0697	61.0443	67.3943	73.225	0	46.4429	50.9042	49.5762	61.2515	0	30.3421	45.7848	49.5828	71.1428	0	35.9975	50.6775	0	14.5785	25.2985
WT15	M	0	54.7383	39.6657	41.4583	36.7203	0	34.6742	45.1815	32.0669	60.8089	0	54.7854	36.0554	46.7101	67.8994	0	52.8075	13.1775	0	56.5485	18.1585
WT16	M	0	66.0677	61.9937	47.6223	55.807	0	42.4115	Data corruption			0	14.1541	4.77476	10.1761	1.80209	0	60.8075	49.8542	0	50.1752	44.0085
WT17	M	0	55.8723	47.1663	50.5137	60.073	0	26.0055	13.9102	13.2929	30.6949	0	17.0468	29.1848	45.4108	57.8621	0	25.7208	3.15083	0	21.5785	0
WT18	M	0	61.9543	58.2243	47.4543	48.7877	0	45.3889	54.3042	73.1515	76.7169	0	42.4294	53.0674	49.5701	50.6468	1.58166	57.0642	60.4742	13.1952	66.2952	69.8485
KO1	M	8.62301	68.651	70.7083	74.787	71.923	7.38419	63.0715	61.9569	53.9482	66.7649	0	56.2014	56.7948	60.7874	68.0134	0	61.3875	76.5675	11.756	66.3685	59.2285
KO2	M	7.53051	43.5617	41.523	43.8377	46.621	6.29669	33.8095	33.2895	35.1335	37.6649	9.57659	56.2268	41.7114	43.7094	48.1794	2.66249	39.9575	33.7075	13.576	40.4785	7.43855
KO3	M	11.5797	62.0783	60.143	62.575	62.2723	20.6767	51.8669	43.2842	37.7742	39.0349	20.4241	50.2948	39.3361	47.7708	47.2088	3.50249	81.9275	66.7475	15.981	61.9085	60.1185
KO4	M	4.23551	47.8443	50.0243	40.1943	44.345	19.0942	41.7242	30.2962	37.4142	42.9389	15.3499	39.6581	40.9308	37.5254	49.4881	0	23.8875	47.1075	4.46605	9.22855	29.7585
KO5	M	13.1497	75.639	74.6337	77.8203	80.211	5.59169	66.3282	71.1635	60.1922	64.9429	17.4416	71.5274	75.0268	56.2361	73.2494	10.26	59.8875	88.2075	17.6335	59.2285	0
KO6	M	4.43717	43.691	51.1717	56.5317	62.2817	7.03252	63.7769	55.8222	28.2262	55.3515	4.03993	60.3808	58.3648	62.7121	36.8748	2.43249	47.4975	80.2475	7.35355	60.1185	77.0785
KO7	M	36.8888	53.4483	51.381	48.9217	62.8283	8.72836	30.5809	32.0375	41.8622	29.5682	0	32.2381	44.4468	54.8034	69.9101	11.36	39.5375	69.6275	15.3935	27.0785	37.7985
KO8	M	19.2422	79.4577	81.9503	83.5577	84.151	10.4892	66.6182	75.3529	77.1202	80.9229	30.1683	81.3988	88.6148	87.5348	84.1308	1.08499	54.5775	59.0075	15.9035	38.6885	69.0485
KO9	M	11.9288	65.6257	61.9743	60.2917	66.0223	17.5234	51.0269	51.5355	48.9135	55.0282	2.47076	39.8301	44.4481	43.3134	61.6974	1.99999	48.3875	35.1075	42.116	40.8685	13.4385
KO10	M	0	46.3263	47.431	55.441	53.5663	0	44.7449	57.0209	56.0875	65.9495	0	41.0521	52.3954	55.2881	60.3848	0	31.5675	41.3075	0	40.4785	47.6185
KO11	M	0	46.6537	35.7197	20.083	33.587	0	3.49286	0.676858	20.4622	27.9269	0	5.80343	5.42943	5.67143	8.25143	3.08499	45.7275	12.0975	0	29.7585	10.1185
KO12	M	0	53.063	47.4223	44.1883	52.1443	0	37.6469	32.6122	22.2262	30.0462	0.894093	12.3668	7.43943	4.21543	19.6741	0	39.0675	23.8875	0	18.1585	34.2285
KO13	M	0	45.5077	41.5523	40.613	41.0217	0	33.5875	38.8415	38.3675	36.0569	0	29.1328	28.3514	36.7294	19.7154	0	39.9575	22.9975	0	22.6185	23.5085
KO14	M	0	48.5023	39.1163	23.2677	22.941	0	25.9889	9.83819	7.38619	14.1902	0	9.83009	10.3561	14.7754	14.2294	0	45.3175	34.6075	0	38.2185	22.2885
KO15	M	0	38.821	35.8443	39.0723	48.703	0	27.1775	37.7502	49.5909	52.2829	0	27.2988	28.4114	30.3621	25.5341	0	27.4575	38.1775	0	11.0085	0
KO16	M	0	51.703	48.987	49.3577	52.5757	0	42.7575	46.3329	45.1375	51.4262	0	28.2841	43.5761	51.1541	53.7994	0	45.8242	58.6308	0	40.2652	43.9385
KO17	M	0	47.265	50.0617	46.7763	51.2397	0	20.5115	24.0815	43.8895	48.6282	0	31.5508	45.1734	34.3381	51.1908	0	23.7742	41.6542	0	38.2485	18.6385
KO18	M	2.37551	79.6657	75.013	72.2817	76.2657	0	54.8495	62.0142	50.5429	47.4809	0	54.9774	63.7834	62.0054	68.4741	0.880827	69.3675	35.1075	28.9544	52.2585	64.5152
KO19	M	5.46967	50.263	55.0983	38.945	51.3237	8.02836	43.4589	Data corruption			0.00575994	38.0694	55.0261	56.3588	34.3248	15.3608	42.9342	49.7142	15.5177	37.6319	51.0752
KO20	M	0	34.255	49.6183	44.147	40.149	0	43.1042	40.8435	39.8129	41.8382	0	31.7181	54.4434	63.5948	61.0674	15.0708	71.0775	39.5675	34.4602	73.4052	18.3785
WT1	F	0.876667	20.7733	35.1073	20.7673	42.7747	1.54667	33.2493	42.3913	43.6293	55.7567	2.4125	24.2673	15.246	31.3607	17.9707	0.450833	4.43333	17.71	1.12667	29.3533	10.81
WT2	F	3.11667	22.6187	43.284	29.5207	56.282	0.889167	34.9747	25.0927	56.236	43.9547	0.450833	8.71467	4.08733	30.678	62.276	4.01	13.27	0	0	0	0
WT3	F	19.9808	66.9933	80.3373	76.0547	82.6593	22.9742	63.6707	86.2867	83.3187	86.582	18.44	72.8827	79.98	67.4493	65.4673	19.115	67.26	60.18	24.3175	62.5	50.44
WT4	F	2.0025	51.9447	62.4233	49.5833	76.9747	1.3275	40.0187	59.944	62.5173	68.61	2.22917	34.942	56.9173	52.836	57.3693	0.89	41.07	52.68	3.54	50	43.75
WT5	F	19.1617	71.2993	71.9293	68.5453	81.684	12.69	69.35	71.9033	74.9267	74.9407	17.6983	57.6667	69.778	63.6747	69.4453	19.18	82.3	76.11	27.82	60.71	69.64
WT6	F	0.450833	56.1733	78.3167	81.7407	85.344	4.42833	50.6453	73.3273	75.064	75.4193	2.655	44.224	57.2967	66.3333	66.4533	2.225	7.96	35.4	3.1075	46.43	54.87
WT7	F	Data corruption																		19.6275	75.22	77.88
WT8	F	Data corruption																		14.06	25.89	57.14
WT9	F	1.98583	53.428	56.576	60.9847	59.9487	0.450833	38.4127	36.8707	36.79	43.3387	2.87417	31.4087	41.9487	50.8487	39.7207	0	25.66	16.96	0	6.25	8.93
WT10	F	1.34	55.316	37.3633	48.616	54.022	5.76667	51.048	51.0333	36.4727	40.706	4.24333	37.8807	31.1513	34.3767	37.066	2.68	28.32	23.21	0.885	0	1.79
WT11	F	4.245	66.486	57.098	49.298	39.9587	3.79917	27.904	32.594	41.6507	41.84	2.46583	23.964	25.8893	29.6447	20.4773	2.2175	25	4.46	3.125	20.54	23.21
WT12	F	2.67833	81.1907	78.354	76.0133	76.5013	2.88	58.7107	62.526	60.0333	46.4687	4.445	46.8747	65.6993	65.516	70.5407	11.1225	75	83.93	4.665	66.96	58.04
WT13	F	0.450833	38.9313	38.4453	42.6073	50.1327	5.8075	41.3467	34.2393	31.8773	32.93	5.12083	34.524	27.436	25.7787	31.3527	0.4425	44.64	40.18	0.4475	37.17	43.36
WT14	F	2.25333	78.3393	74.0887	68.8533	78.2593	3.53917	45.918	60.1767	76.8987	76.994	0.438333	49.942	45.0513	44.638	52.1193	2.24083	66.29	68.11	15.0958	72.1467	66.88
WT15	F	0.438333	70.4313	59.1747	55.6847	68.6213	0.450833	34.1353	41.928	47.6247	49.768	0.889167	25.9987	34.0687	22.6467	25.818	0.450833	49.4767	63.3233	0.450833	63.94	57.61
WT16	F	0.438333	50.692	47.4833	42.6133	43.4713	2.21	35.9747	39.7587	34.4133	41.4707	2.015	27.0647	27.1073	26.9273	26.8087	8.70667	52.2533	15.9067	2.015	17	28.5933
WT17	F	5.37083	57.492	65.3673	63.028	66.3587	1.57667	58.25	54.926	60.2333	54.5233	7.26583	51.91	53.7747	58.4387	63.366	6.52083	77.5267	55.24	17.0525	36.6533	62.4967
KO1	F	49.65	65.0073	67.1413	65.2827	67.686	27.5842	68.3587	62.5647	66.2247	68.966	7.095	55.7273	60.668	63.5233	51.426	19.3625	45.54	54.46	36.45	62.5	72.32
KO2	F	38.9283	55.2907	70.322	62.3533	66.084	37.2217	50.27	59.7433	58.7427	64.008	16.5008	51.2273	55.5047	59.474	73.674	29.51	51.79	59.82	31.515	49.11	65.18
KO3	F	1.3275	47.6433	65.7947	63.798	71.6233	4.44	52.906	74.7373	68.4407	79.4693	3.60333	27.666	47.9	54.3533	53.8407	0.4475	44.25	40.71	1.7825	24.11	50.89
KO4	F	25.83	58.4687	68.3273	71.398	71.632	6.25917	44.9787	54.4947	47.2307	68.4587	10.2542	39.412	51.36	35.424	16.8993	16.8975	50	88.39	36.4775	66.96	68.75
KO5	F	10.4492	63.3333	69.8107	69.3633	68.7767	16.7275	53.7033	57.0847	54.372	55.8473	1.57667	43.12	57.4767	46.05	55.708	4.2425	61.95	79.65	10.6925	58.93	83.93
KO6	F	0.450833	48.5587	52.1567	56.2027	53.8693	13.6142	40.564	43.9207	48.0227	52.158	9.335	26.0267	27.71	54.2733	65.1733	1.34	40.71	29.2	1.1175	41.07	26.55
KO7	F	35.8358	54.9127	19.6813	13.1193	20.7067	14.3367	26.8447	26.3853	13.5713	25.1353	16.4	3.89667	10.6687	8.19867	7.14133	5.35167	49.8567	79.42	Data corruption
KO8	F	Data corruption
KO9	F	6.01583	65.4853	52.46	52.972	62.9167	2.24083	48.2173	40.6173	55.122	62.554	1.12667	41.134	39.866	47.6207	52.8593	6.005	64.29	64.29	1.3325	56.25	34.82
KO10	F	1.3275	25.306	6.55667	16.1113	4.66467	12.1983	11.3467	20.6113	13.9573	14.4387	4.445	3.74133	7.31533	17.62	6.73333	4.8675	5.36	3.57	0.4475	33.93	9.82
KO11	F	0.901667	14.698	12.5893	16.2553	21.2807	1.34	22.144	23.148	11.9067	17.6967	8.2025	23.5473	20.7867	16.78	20.6407	0.885	0	7.14	0	1.77	3.54
KO12	F	1.09583	23.2813	21.466	10.2367	16.9567	2.88667	7.32667	8.52467	14.898	6.79533	Data corruption					2.8975	9.82	27.68	0	19.64	3.57
KO13	F	0.438333	52.2887	47.9373	44.5707	40.2607	2.46583	35.802	43.144	37.7713	31.7313	0.438333	18.53	39.502	47.5293	39.5573	3.76333	56.8067	48.1033	1.33917	41.68	51.5167
KO14	F	8.68833	63.0333	56.6047	61.038	60.1367	0.438333	36.946	35.9567	42.6373	49.3253	0.438333	29.3133	28.8333	25.8227	38.088	1.32833	55.5233	58.18	32.9008	46.1367	48.0567
KO15	F	1.315	57.9093	45.3207	55.1207	63.604	1.79	31.256	38.2647	38.352	41.9773	1.76583	18.004	19.2927	13.874	17.654	2.69167	39.4033	53.7	1.32833	42.8867	58.7733
KO16	F	19.5892	78.62	68.852	64.49	61.6587	12.5117	64.6887	67.7	63.8493	61.276	21.5567	63.5467	72.93	79.3373	67.4293	36.3633	73.9467	77.6433	29.215	69.7267	62.02
KO17	F	3.7875	50.8727	53.1387	47.6287	47.004	13.0683	60.698	62.632	84.5007	78.872	5.5125	31.1527	44.0407	49.2187	79.0813	4.19	54.4533	57.99	11.13	37.53	49.0267
