# Supplementary material for: Isoform-specific roles for AKT in affective behavior, spatial memory, and extinction related to psychiatric disorders
Source: eLife. 2020 Dec 16;9:e56630. doi: 10.7554/eLife.56630 (PMC7787664; doi:10.7554/eLife.56630)
Supplement: Figure 5—source data 1. [file elife-56630-fig5-data1.xlsx]

## Sheet: 5D
Genotype	Sex	Treatment	Training Pre-CS Freezing %	Training Freezing CS1 %	Training Freezing CS2 %	Context 24 h Freezing %	Cued 24 h Pre-CS Freezing %	Cued 24 h Freezing CS1 %	Cued 24 h Freezing CS2 %
WT1	M	WT sham	6.67	16.54	33.46	16.55	1.33	75	92.86
WT2	M	WT sham	0.45	5.31	45.54	29.96	11.33	50.89	46.43
WT3	M	WT sham	0	3.57	12.39	10.61	2.23	26.79	31.25
WT4	M	WT sham	0.22	0	23.21	12.28	4.22	53.57	61.61
WT5	M	WT sham	0	9.82	18.75	41.19	4	40.18	67.86
WT6	M	WT sham	0.22	16.07	38.94	5.26	5.1	50	63.39
WT7	M	WT sham	0.67	17.86	10.71	34.88	4.02	52.21	68.14
WT8	M	WT sham	2.9	13.39	37.5	21.27	12.04	54.87	66.37
WT9	M	WT sham	0.67	1.77	10.71	30.15	15.54	27.68	56.25
WT10	M	WT sham	0	35.87	62.54	9.69	6.85	73.14	73.19
WT11	M	WT sham	0.9	3.6	34.02	18.37	12.32	52.54	79.61
WT12	M	WT sham	0.89	0	25.66	8.31	0.9	44.64	65.18
WT13	M	WT sham	0	18.83	28.59	27.41	9.08	64.2	83.9
WT14	M	WT sham	0	5.41	47.75	23.86	19.77	64.87	74.28
WT15	M	WT sham	0	49.26	53.32	45.15	25.53	47.2	75.79
KO1	M	KO sham	0	8.93	58.04	28.22	0.67	61.95	82.3
KO2	M	KO sham	0.22	0	41.59	15.12	3.34	62.5	68.75
KO3	M	KO sham	0.22	0.89	36.61	27.8	4.23	38.94	76.99
KO4	M	KO sham	0	7.96	32.74	15.59	1.33	47.32	52.21
KO5	M	KO sham	0.67	5.36	29.2	37.07	4.91	66.07	62.5
KO6	M	KO sham	0	0	13.28	2.6	0.89	56.05	65.08
KO7	M	KO sham	0	3.99	51.73	21.79	6.92	48.84	54.76
KO8	M	KO sham	0.44	50.71	78.52	16.01	4.47	79.28	90.14
KO9	M	KO sham	3.33	14.32	11.59	35.52	12.06	65.01	83.93
KO10	M	KO sham	0.15	3.27	45.41	23.71	2.75	54.46	76.01
KO11	M	KO sham	6.6	12.4	20.65	18.89	6.97	61.61	56.99
KO1+AKT1	M	KO+AKT1PFC	0	0.88	15.18	14.34	2	33.04	75.89
KO2+AKT1	M	KO+AKT1PFC	0	0.88	8.93	10.34	2.22	73.21	85.71
KO3+AKT1	M	KO+AKT1PFC	0.44	33.04	27.68	9.07	6.69	51.33	64.6
KO4+AKT1	M	KO+AKT1PFC	0.89	20.54	52.68	8.64	18.91	57.14	96.43
KO5+AKT1	M	KO+AKT1PFC	0.66	19.64	33.04	24.59	13.34	53.57	58.93
KO6+AKT1	M	KO+AKT1PFC	0	23.21	0	14.51	8.01	63.39	64.29
KO7+AKT1	M	KO+AKT1PFC	2	16.96	36.61	36.04	4.24	42.48	66.37
KO8+AKT1	M	KO+AKT1PFC	0	7.96	74.11	8.63	2.67	62.5	77.68
KO9+AKT1	M	KO+AKT1PFC	0	0	0	8.84	19.4	69.64	79.46
KO10+AKT1	M	KO+AKT1PFC	0	15.93	41.07	55.19	2.89	66.96	60.71
KO11+AKT1	M	KO+AKT1PFC	2.67	19.7	35.33	66.16	25.55	59.51	90.33

## Sheet: 5E
Genotype	Sex	Treatment	D1 Pre-CS Freezing %	D1 CS1-5 Freezing %	D1 CS6-10 Freezing %	D1 CS11-15 Freezing %	D1 CS16-20 Freezing %	D2 Pre-CS Freezing %	D2 CS1-5 Freezing %	D2 CS6-10 Freezing %	D2 CS11-15 Freezing %	D2 CS16-20 Freezing %	D3 Pre-CS Freezing %	D3 CS1-5 Freezing %	D3 CS6-10 Freezing %	D3 CS11-15 Freezing %	D3 CS16-20 Freezing %	Extinction LTM pre-CS freezing %	Extinction LTM CS1 freezing %	Extinction LTM CS2 freezing %	Renewal pre-CS freezing %	Renewal CS1 freezing %	Renewal CS2 freezing %
WT1	M	WT sham	3.11	57.78	61.98	56.61	66.81	6.43	47.26	40.72	29.86	25.76	21.21	45.99	32.62	17.8	25.09	0.44	8.93	21.43	1.34	43.75	38.39
WT2	M	WT sham	28.93	75.04	81.62	67.64	75.71	7.99	65.6	58.98	67.98	55.59	13.52	60.41	58.35	55.52	42.58	2.44	49.11	17.86	3.35	2.68	12.39
WT3	M	WT sham	7.08	61.22	85.21	81.57	75.94	2.89	41.9	47.85	57.12	42.72	9.57	47.29	53.69	46.89	39.92	1.11	0.89	13.39	4.88	33.04	33.93
WT4	M	WT sham	7.54	61.63	77.4	56.8	64.84	5.78	59.58	69.36	77.63	75.16	12.89	47.41	56.34	63.46	61.12	1.35	61.05	52.23	died
WT5	M	WT sham	2.7	57.92	58.97	56.54	61.4	5.16	65.18	63.5	56.39	69.26	4.4	47.69	41.54	26.94	51.63	1.57	15.93	58.41	0.89	25	34.82
WT6	M	WT sham	2.9	61.92	77.64	77.27	78.02	1.55	46.07	43.12	49.95	57.79	0.9	18.39	27.74	22.67	28.71	1.33	14.16	17.7	3.12	16.96	19.64
WT7	M	WT sham	20.03	70.1	74.43	72.44	76.23	2.01	57.89	49.72	51.13	52.93	21.2	59.52	68.56	66.49	69.52	10.7	75.22	56.64	5.57	44.64	37.5
WT8	M	WT sham	9.38	66.35	76.05	78.36	81.38	6.69	70.31	62.04	59.8	67.17	7.83	62.19	68.46	69.97	67.7	3.8	79.65	27.43	1.56	61.61	67.86
WT9	M	WT sham	13.83	68.54	76.88	81.33	84.36	24.02	68.27	83.52	87.86	84.8	3.99	46.12	59.17	57.79	42.79	1.34	2.68	3.57	died
WT10	M	WT sham	0.88	67.21	79.22	81.03	85.55	6.88	62.62	66.52	64	82.85	1.35	45.35	32.94	49.5	72.59	0.89	18.61	27.5	0	48.1	48.2
WT11	M	WT sham	5.59	66.83	71.02	64.46	68.65	0.44	46.75	40.48	51.86	59.63	1.34	28.16	38.36	39.11	44.42	4.03	25.58	46.32	1.99	43.53	30.23
WT12	M	WT sham	1.55	60.63	60.08	70.57	59.79	3.55	39.02	44.8	50	57.9	4.2	31.05	33.03	25.03	36.04	2.23	31.78	9.82	1.35	19.63	34.59
WT13	M	WT sham	3.11	50.98	54.08	62.27	73.2	3.57	62.95	62.75	58.18	72.69	1.77	46.17	47.87	55.19	58.12	0	53.32	27.81	1.35	61	59.32
WT14	M	WT sham	4.89	73.85	73.72	78.56	83.01	0.45	35.7	57.63	64.87	61.72	3.09	50.66	68.39	61.84	29.38	2.9	32.69	41.17	4.91	26.72	74.85
WT15	M	WT sham	13.31	60.63	57.65	59.6	63.6	25.94	45.35	46.02	62.4	71.09	43.49	47.83	58.42	66.46	74.03	8.05	31.16	37.24	31.98	39.97	31.11
KO1	M	KO sham	3.32	67.97	65.84	74.14	74.15	8.5	41.09	30.45	32.75	24.84	16.05	36.97	40.71	32.61	21.01	2.66	10.71	13.39	3.33	40.71	38.39
KO2	M	KO sham	7.1	53.86	41.56	41.17	39.93	13.8	63.28	44.91	38.08	26.72	6.48	28.67	31.91	21.26	18.02	0.22	14.29	12.5	0.22	0	0
KO3	M	KO sham	16.22	59.96	73.01	54.02	61.5	7.3	34.92	60.34	51.59	55.94	21.8	21.36	16.9	15.74	36.4	3.78	2.68	8.04	1.33	44.64	27.68
KO4	M	KO sham	5.79	59.13	51.87	48.78	50.62	8.08	49.36	31.45	26.56	18.88	1.38	24.4	15.52	17.85	24.75	0.56	11.51	7.08	2.9	15.55	17.33
KO5	M	KO sham	1.34	47.48	38.37	42.77	43.32	1.87	20.7	19.07	21.12	15.95	10.26	12.5	3.18	14.03	21.05	1.33	4.91	4.01	1.78	32.14	26.79
KO6	M	KO sham	5.79	53.83	53.99	39.08	21.97	0.89	13.21	9.97	9.63	17.11	0.9	8.09	1.95	2.3	4.76	1.55	14.22	13.51	0	35.47	9.91
KO7	M	KO sham	0.89	57.1	65.6	70.06	82.53	2.24	59.42	66.27	76.51	78.89	0.89	19.02	25.16	32.79	34.51	0.9	17.83	19.58	0	22.09	38.86
KO8	M	KO sham	1.77	70.94	64.97	83.81	69.32	4.65	52.97	39.11	18.33	30.72	5.11	28.13	14.75	6.79	23.78	0.66	25.01	7.99	0	62.66	49.5
KO9	M	KO sham	10.68	63.59	64.39	67.99	68.94	21.11	63.57	66.05	46.19	51.03	7.12	69.5	56.86	76.77	72.43	4.2	30.51	33.62	31.57	41.84	39.33
KO10	M	KO sham	12.87	66.85	80.13	66.53	73.94	14.45	58.82	62.81	54.88	56.89	5.21	37.5	42.23	32.16	34.29	1.41	28.31	28.91	1.63	28.45	22.02
KO11	M	KO sham	3.11	58.66	56.66	62.97	69.54	8.67	50.27	48.26	50.89	55.68	17.25	43.85	42.77	36.5	34.81	4.75	22.26	17.85	0.89	10.71	13.39
KO1+AKT1	M	KO+AKT1PFC	5.83	58.57	75.49	84.34	91.2	8.48	52.83	55.98	45.32	55.58	5.59	55.61	53.16	42.53	37.97	2.67	7.04	23.16	1.55	36.05	27.23
KO2+AKT1	M	KO+AKT1PFC	0.88	79.05	85.78	88.79	70.46	1.1	39.75	53.39	49.08	53.24	13.68	55.73	78.3	64.66	74.88	3.57	71.76	6.16	2	16.88	10.69
KO3+AKT1	M	KO+AKT1PFC	1.8	57.43	61.29	64.29	58.52	4.7	39.44	49.09	62.05	60.75	4.9	40	42.22	42.43	42.81	0.45	46.9	12.39	2.01	19.64	21.43
KO4+AKT1	M	KO+AKT1PFC	19.98	36.69	30.84	37.09	38.18	1.34	30.28	37.27	18.9	23.81	2.42	63.51	11.78	5.73	9.44	2.9	1.77	36.19	2.01	0	3.57
KO5+AKT1	M	KO+AKT1PFC	5.52	76.44	72.69	72.48	72.61	2.46	70.85	74.76	84.14	86.39	10.73	52.58	64.49	67.6	84.07	0.45	40.71	41.59	1.33	55.36	58.04
KO6+AKT1	M	KO+AKT1PFC	8.46	74.93	80.85	86.37	88.65	9.71	57.7	48.88	64.93	43.29	6.89	60.03	55.75	58.37	58.38	3.33	43.36	55.75	0	8.04	5.36
KO7+AKT1	M	KO+AKT1PFC	22.46	83.1	86.99	82.57	76.96	9.16	77.63	55.48	63.39	44.1	10.34	38.62	28.12	32.67	26.04	2.23	35.4	18.58	0.89	55.36	33.93
KO8+AKT1	M	KO+AKT1PFC	8.26	79.3	76.89	80.44	82.15	3.96	57.92	59.06	52.44	79.93	0.44	47.31	57.25	44.13	60.07	3.99	32.8	32.68	died
KO9+AKT1	M	KO+AKT1PFC	4.68	43.27	32.78	26.34	34.97	12.17	30.66	29.3	26.13	29.31	2.21	14.76	7.87	15.5	20.28	2	1.87	12.5	died
KO10+AKT1	M	KO+AKT1PFC	22.59	64.27	57.73	61.61	81.57	22.29	49.43	63.17	71.37	77.63	7.8	45.62	46.65	40.45	31.97	2.45	56.64	10.62	died
KO11+AKT1	M	KO+AKT1PFC	0.44	63.77	68.53	67.01	75.04	9.39	62.46	64.1	81.88	76.9	6.02	50.15	58.15	66.69	83.02	28.81	67.9	70.36	14.76	49.72	83.31
