# Supplementary material for: Isoform-specific roles for AKT in affective behavior, spatial memory, and extinction related to psychiatric disorders
Source: eLife. 2020 Dec 16;9:e56630. doi: 10.7554/eLife.56630 (PMC7787664; doi:10.7554/eLife.56630)
Supplement: Figure 6—source data 1. [file elife-56630-fig6-data1.xlsx]

## Sheet: 6A
Genotype	Center Time	OFA Distance
WT1	15.93	3731.43
WT2	14.76	4884.28
WT3	19.29	4813.76
WT4	25.87	3496.35
WT5	19.49	4072.81
WT6	5.76	4437.05
WT7	13.98	4548.4
WT8	9.29	5318.04
WT9	9.94	4698.36
WT10	11.01	4895.52
WT11	10.05	3563.76
WT12	10.62	6018.41
WT13	11.04	3828.4
WT14	11.56	4827.47
KO1	12.94	4505.02
KO2	5.71	5355.8
KO3	17.14	4016.28
KO4	48.3	3772.85
KO5	7.44	6001.36
KO6	13.23	5204.89
KO7	6.45	5121.6
KO8	9	3056.25
KO9	8.43	5610.17
KO10	7.48	5447.41
KO11	6.4	3363.49
KO12	10.17	3036.54
KO13	7.2	5256
KO14	22.42	5399.28
KO15	8.75	5090.77
KO16	8.67	4723.68
KO17	7.5	3738.77
KO18	32.13	3760.25
KO19	6.58	6311.15
KO20	13.89	5655.4

## Sheet: 6B
Genotype	Open Arm Time	EPM Distance
WT1	13.5	1674.74
WT2	6.99	1593.32
WT3	32.06	1451.15
WT4	20.6	1404.26
WT5	4.55	1291.61
WT6	23.22	1463.7
WT7	15.25	1754.59
WT8	27.55	1846.7
WT9	28	1624.54
WT10	37.27	1357.64
WT11	35.26	1214.52
WT12	11.91	1801.88
WT13	8.42	1184.49
WT14	13.8	1532.58
KO1	19.99	1771.39
KO2	23.94	1642.31
KO3	13.57	1468.3
KO4	40.4	1064.86
KO5	12.17	2145.2
KO6	14.78	1681.62
KO7	18.9	1938.74
KO8	0.31	1162.42
KO9	27.59	1875.11
KO10	0.43	1739.31
KO11	3.1	1237.69
KO12	24.15	1205.79
KO13	29.66	1460.16
KO14	30.03	1280.49
KO15	14.16	1168.23
KO16	8.42	1170.43
KO17	17.26	1090.54
KO18	78.18	860.88
KO19	26.51	1817.06
KO20	15.09	1571.63

## Sheet: 6C
Genotype	D1	D2	D3	D4	D5	D6	D7	D8	R1	R2	R3	V1	V2	Probe Target Quad Time	Probe Target Platform Crossings	Velocity	Distance
WT1	60.09	60.09	60.09	47.25	38.49	25.12	30.56	21.08	38.36	26.48	22.51	21.79	11.27	28.96	5	11.94	716.88
WT2	60.09	60.09	33.74	37.53	37.62	40.72	27.92	29.52	49.7	27.41	22.53	28.02	12.36	26.49	4	13.96	838.69
WT3	57.7	52.67	22.71	17.04	13.3	17.57	18.3	17.13	55.96	20.38	11.94	18.96	6.51	35.43	4	23.7	1246.91
WT4	60.09	40.75	37.73	58.17	48.67	39.55	9.01	28.35	38.37	52.46	54.97	13.41	11.72	31.83	3	17.46	1047.35
WT5	31.09	60.09	58.74	29.55	32.12	36.51	18.89	25.68	17.91	27.22	16.32	20.75	16.71	19.09	3	19.09	1145.42
WT6	57.88	60.09	50.99	48.12	41.18	32.02	15.61	16.23	60.09	55.28	54.82	11.93	7.97	47.05	8	12.93	776.3
WT7	56.54	60.09	36.29	49.47	19.89	28.14	14.98	10.51	36.16	26.21	15.95	8.95	7.12	34.1	6	16.14	968.17
WT8	60.09	57.64	53.85	46.85	49.54	49.56	41.59	44.75	60.09	45.82	30.04	8.37	5.51	16.75	1	17.51	1045.51
KO1	60.09	35.55	35.67	26.35	19.46	29.2	13.21	15.37	48.24	34.16	35.12	7.51	5.08	38.54	8	17.22	1032.84
KO2	60.09	50.4	27.59	18.03	29.77	18.7	21	16.08	33.43	28.44	38.68	10.03	6.62	45.58	4	11.26	676.53
KO3	60.09	40.8	44.14	41.43	36.76	39	10.73	25.41	36.95	32.98	24.81	20.45	8.99	26.43	4	16.91	1014.76
KO4	53.57	44.59	44.78	27.6	49.51	18.54	42.6	18.79	60.09	42.68	38.44	11.8	7.48	33.13	1	11.28	672.91
KO5	60.09	60.02	47.31	60.06	60.09	39.8	54.32	33.41	19.57	41.67	19.7	18.33	13.82	17.25	3	15.2	913.06
KO6	55.07	60.09	38.26	38.26	60.09	41.25	17.76	18.65	45.93	45.83	47.52	9.54	10.24	36.54	3	15.07	896.71
KO7	60.09	60.09	60.09	60.09	60.09	35.49	43.8	36.05	53.45	44.5	35.91	11.29	9.1	21.39	1	21.63	1291.99
KO8	59.89	55.46	53.85	48.57	46.98	25.11	37.8	23.36	35.02	46.64	26.88	23.09	4.34	17.12	2	18.14	1089.53

## Sheet: 6D
Genotype	Training Pre-CS Freezing %	Training Freezing CS1 %	Training Freezing CS2 %	Context 24 h Freezing %	Cued 24 h Pre-CS Freezing %	Cued 24 h Freezing CS1 %	Cued 24 h Freezing CS2 %
WT1	0	1.75	19.35	44.26	12.94	32.31	77.52
WT2	0	1.75	16.12	34.45	2.21	40	81.98
WT3	6.4	0	0	0.53	0.44	57.02	67.9
WT4	0	6.31	32.43	20.28	3.32	54.27	61.5
WT5	0	0	21.62	15.44	3.09	70.29	57.13
WT6	0	19.49	36.63	20.38	21.52	47.27	67.78
WT7	0	0	39.19	35.32	3.11	78.45	85.59
WT8	0	14.06	54.95	36.03	7.31	40.23	59.55
WT9	0	16	30.2	29.07	0.44	41.01	58.84
WT10	0	39.41	48.48	54.88	1.78	47.96	73.59
WT11	0	0	30.91	41.32	1.77	31.17	75.68
KO1	0	18.92	43.1	6.98	0.44	64.08	80.35
KO2	0	15.96	60.76	6.98	2.44	75.89	84.85
KO3	0	1.8	0	3.47	1.11	51.71	77.57
KO4	0	9.91	39.55	6.58	1.33	62.42	62.04
KO5	0	4.5	39.31	0.97	0.44	24.85	40.97
KO6	0	6.23	31.96	12.38	0.45	39.12	61.97
KO7	1.11	0	1.8	9.29	0.44	17.66	62.35
KO8	0	24.25	14.25	0.36	4.45	29.4	26.67
KO9	0	1.8	74.4	9.73	1.13	59.41	62.21
KO10	0	1.75	53.39	30.92	0.44	62.59	82.1
KO11	0.44	0	11.71	3.9	1.55	48.88	80.54
KO12	0	2.7	44.79	44.63	3.73	20.6	54.27
KO13	0	1.8	26.77	46.09	13.97	20.72	71.05

## Sheet: 6E
Genotype	D1 Pre-CS Freezing %	D1 CS1-5 Freezing %	D1 CS6-10 Freezing %	D1 CS11-15 Freezing %	D1 CS16-20 Freezing %	D2 Pre-CS Freezing %	D2 CS1-5 Freezing %	D2 CS6-10 Freezing %	D2 CS11-15 Freezing %	D2 CS16-20 Freezing %	D3 Pre-CS Freezing %	D3 CS1-5 Freezing %	D3 CS6-10 Freezing %	D3 CS11-15 Freezing %	D3 CS16-20 Freezing %	Extinction LTM pre-CS freezing %	Extinction LTM CS1 freezing %	Extinction LTM CS2 freezing %	Renewal pre-CS freezing %	Renewal CS1 freezing %	Renewal CS2 freezing %
WT1	10.19	80.09	82.05	76	79.08	6.42	68.17	74.7	67.1	80.13	4.25	47.82	70.86	63.82	75.91	7.55	61.48	52.56	5.49	54.17	59.79
WT2	2.02	50.13	58.41	53.75	58.76	2.44	43.9	36.98	38.36	41.84	1.35	33.64	48.49	43.95	44.5	0.9	44.33	47.84	0	41.23	29.33
WT3	0.45	59.08	68.28	64.94	63.58	1.34	34.65	28.26	40.65	38.19	1.33	25.82	26.81	34.58	48.05	0.44	11.59	12.56	1.13	0	0
WT4	3.37	59.62	68.45	64.88	63.25	2.2	47.12	45.1	51.11	47.97	0.88	27.88	47.06	56.65	75.52	1.34	37.46	26.72	2.22	14.18	25.77
WT5	0.45	57.24	60.01	60.89	68.77	1.34	39.27	51.36	54.62	75.81	0.88	33.63	49.97	55.86	60.72	4.67	45.35	61.55	2.02	33.59	37.13
WT6	1.35	54.97	46.33	54.1	65.56	0.9	43.4	24.5	21.86	33.21	2.64	30.07	25.71	25.17	33.91	0.45	16.93	32.08	6.45	48.34	66.78
WT7	8.17	54.08	58.3	46.93	52.68	3.79	59.33	58.93	54.97	60.75	6.42	45.65	52.65	57.84	69.29	3.56	85.61	85.89	36.88	66.43	68.18
WT8	0.9	75.91	70.48	65.62	69.12	7.16	62.38	49.77	54.28	60.33	3.11	37.95	40.17	53.44	45.81	0.44	40.02	26.48	13.6	56.92	66.9
WT9	1.11	50.53	53.32	51.65	68.7	4.91	30.86	41.28	48.31	55.85	2.44	38.75	43.25	75.06	79.45	5.33	41.96	41.35	8.7	49.79	45.24
WT10	1.79	55.66	52.45	50.7	60.48	3.33	37.55	33.74	28.93	30.15	0.45	17.84	18.9	26.41	29.29	5.12	28.57	51.71	0.44	50.73	41.06
WT11	2.23	79.25	88.1	84.5	83.71	5.79	75.96	70.65	77.42	84.08	4.22	70.07	58.73	64.99	73.25	3.37	59.03	81.58	0.9	62.07	59.08
KO1	1.34	75.51	72.28	72.92	85.37	2.66	54.73	62.6	68.34	68.7	0.45	45.32	52.41	55.29	61.22	1.34	18.47	32.72	0.68	32.24	29.16
KO2	0.44	80.39	74.38	76.4	79.8	1.13	56.42	68.87	58.87	70.76	2.47	42.55	42.11	53.93	47.92	0.44	12.33	51.92	2	70.7	41.7
KO3	0.45	72.07	67.2	69.38	72.45	2.92	60.67	63.37	64.6	76.72	0.88	23.26	42.57	49.5	60.38	3.99	63.28	45.4	0.9	39.21	25.84
KO4	1.13	60.37	52.6	38.67	41.06	1.1	28.78	26.87	25.04	27.72	1.34	12.41	14.76	25.48	29.15	2.42	40.92	28.64	4.65	26.79	23.37
KO5	0.45	45.03	42.26	38.89	55.95	0.44	16.61	27.37	32.09	43.92	0.44	10.32	26.82	37.16	53.95	5.11	35.63	33	0.45	12.28	10.74
KO6	1.78	71.52	72.81	75.92	84.41	0.44	52.29	73.33	77.73	80.97	4.23	47.85	64.73	66.69	86.65	1.34	41.92	51.82	4.64	40.92	35.7
KO7	0.89	44.47	35.73	23.63	35.92	1.33	30.54	18.71	22.3	23.65	0.88	27.14	23.77	21.98	43.54	4.42	36.49	28.54	4.26	7.09	10.67
KO8	6.82	25.33	30.1	23.42	37.95	0.9	12.5	14.82	23.14	30.17	3.32	14.61	2.48	5.04	21.39	0	3.6	5.26	0.66	0	0
KO9	1.57	74.1	62.21	61.94	57.51	1.78	63.33	59.4	59.54	54.83	2.67	44.86	34.74	37.98	40.23	3.34	42.94	62.42	5.29	53.79	53.65
KO10	0.45	55.77	47.42	52.25	54.31	0.44	37.93	44.81	36.73	38.43	2.69	21.43	21.19	27.2	18.39	0.44	14.23	16.9	1.32	31.36	33
KO11	0.45	59.25	55.09	48.02	46.92	1.57	39.91	46	40.89	45.61	3.78	36.68	23.93	29.63	36.43	0.45	53.25	65.08	0	38.27	59.84
KO12	5.82	62.86	71.5	68.61	76.06	1.53	43.95	60.23	64.18	65.38	13.74	46.19	61.11	52.05	63.21	1.32	50.97	53.46	1.55	35.51	37.22
KO13	0.45	66.84	76	62.99	61.19	0.88	40.86	37.03	33.78	37.77	2.22	29.79	30.11	49.69	53.87	11.99	32.24	62.9	4.7	19.63	36.6

## Sheet: 6-Supplement1
Genotype	Amygdala AKT1	Amygdala AKT3	PFC AKT1	PFC AKT3
WT1	109.06	86.13	102.42	89.69
WT2	98.34	116.07	99.82	98.99
WT3	84.89	89.78	99.16	102.63
WT4	107.71	108.02	98.6	108.7
WT5	110.88	101.56	91.16	94.93
WT6	89.12	98.44	108.84	105.07
KO1	61.58	101.03	69.43	97.79
KO2	79.02	110.55	72.72	100.15
KO3	50.78	104.81	43.56	109.37
KO4	41.28	80.67	33.09	95.37
KO5	43.56	85.45	33.98	94.39
KO6	35.1	101.85	38.06	91.39
