# Supplementary material for: Isoform-specific roles for AKT in affective behavior, spatial memory, and extinction related to psychiatric disorders
Source: eLife. 2020 Dec 16;9:e56630. doi: 10.7554/eLife.56630 (PMC7787664; doi:10.7554/eLife.56630)
Supplement: Figure 7—source data 1. [file elife-56630-fig7-data1.xlsx]

## Sheet: 7A
Genotype	Sex	Center Time	OFA Distance
WT1	M	5.64	2893.84
WT2	M	8.26	3680.39
WT3	M	7.36	3229.71
WT4	M	9.82	2827.55
WT5	M	8.35	2129.27
WT6	M	19.04	1534.85
WT7	M	21.42	2909.71
WT8	M	9.29	5318.04
WT9	M	9.94	4698.36
WT10	M	11.01	4895.52
WT11	M	22.98	2534.85
WT12	M	5.76	4437.05
WT13	M	13.98	4548.4
WT14	M	10.05	3563.76
WT15	M	12.81	3240.99
KO1	M	12.05	2504.14
KO2	M	6.09	3326.37
KO3	M	15.11	2903.86
KO4	M	11.71	3939.75
KO5	M	10.4	3731.43
KO6	M	9.06	3909.71
KO7	M	15.41	3387.68
KO8	M	14.34	3909.71
KO9	M	8.77	2534.85
KO10	M	7.17	3343.63
KO11	M	21.93	3310.47
KO12	M	11.87	3817.83
KO13	M	15.98	5319.89
WT1	F	39.05	1547.2
WT2	F	16.86	2671.04
WT3	F	11.7	2022.52
WT4	F	11.67	1963.2
WT5	F	7.8	3502.17
WT6	F	11.56	3491.79
WT7	F	10.72	3617.27
WT8	F	4.43	3651.93
WT9	F	17.34	2731.43
WT10	F	9.49	2711.47
WT11	F	26.04	2973.42
WT12	F	15.11	2657.69
WT13	F	12.63	5811.25
WT14	F	8.67	3657.69
WT15	F	16.92	4682.77
WT16	F	12.48	3850.43
KO1	F	8.37	2316.87
KO2	F	11.97	2494.2
KO3	F	8.77	2901.23
KO4	F	8.35	2439.37
KO5	F	19.07	3104.04
KO6	F	7.81	3495.92
KO7	F	15.01	5706.18
KO8	F	14.86	4728.5
KO9	F	14.41	5361.82
KO10	F	11.38	3527.14
KO11	F	8.58	5272.13
KO12	F	6.78	5869.69
KO13	F	7.96	5498.55
KO14	F	13.36	3493.4
KO15	F	12.84	3806.21

## Sheet: 7B
Genotype	Sex	Open Arm Time	EPM Distance
WT1	M	9.62	1586.48
WT2	M	15.5	1194.88
WT3	M	1.71	1229.76
WT4	M	20.05	1808.22
WT5	M	7.28	1305.96
WT6	M	24.85	1634.03
WT7	M	29.13	1608.61
WT8	M	27.55	1846.7
WT9	M	28	1624.54
WT10	M	37.27	1357.64
WT11	M	21.03	1276.52
WT12	M	23.22	1463.7
WT13	M	15.25	1754.59
WT14	M	35.26	1214.52
WT15	M	0.16	777.08
KO1	M	8.89	2527.3
KO2	M	23.34	1355.36
KO3	M	20.72	1255.77
KO4	M	23.38	1742.82
KO5	M	10.93	1133.42
KO6	M	7.85	1917.19
KO7	M	41.34	1015.81
KO8	M	7.47	1089.28
KO9	M	16.08	1098.47
KO10	M	23.67	1258.18
KO11	M	23.3	1144.53
KO12	M	3.2	1239.2
KO13	M	19.66	1331.55
WT1	F	5.87	1479.06
WT2	F	10.29	1804.08
WT3	F	6.79	1745.75
WT4	F	23.14	1574.99
WT5	F	36.02	1416.94
WT6	F	11.66	1337.31
WT7	F	25.06	1288.03
WT8	F	29.29	1666.1
WT9	F	24.43	1949.04
WT10	F	0.26	1374.13
WT11	F	21.86	1739.67
WT12	F	25.91	1881.56
WT13	F	14.89	1618.92
WT14	F	18.07	1223.06
WT15	F	48.29	1675.02
WT16	F	8.79	1070.86
KO1	F	5.04	2035.59
KO2	F	6.91	1953.03
KO3	F	20.45	2249.91
KO4	F	16.99	2123.28
KO5	F	11.82	1500.45
KO6	F	28.58	1647.66
KO7	F	44.34	1458.21
KO8	F	3.44	1826.28
KO9	F	42.67	1648.39
KO10	F	27.76	1512.76
KO11	F	18.6	1546.92
KO12	F	23.8	1541.75
KO13	F	26.55	2120.75
KO14	F	35.94	1508.14
KO15	F	19.67	1301.68

## Sheet: 7C
Genotype	Sex	D1	D2	D3	D4	D5	D6	D7	D8	R1	R2	R3	V1	V2	Probe Target Quad Time	Probe Target Platform Crossings	Velocity	Distance
WT1	M	60.09	50.1	54.84	53.16	48.82	14.01	28.02	14.76	23.01	15.26	11.22	12.99	11.81	32.77	3	14.94	897.19
WT2	M	60.09	60.09	60.09	47.25	38.49	25.12	30.56	21.08	38.36	26.48	22.51	21.79	11.27	28.96	5	11.94	716.88
WT3	M	60.09	60.09	33.74	37.53	37.62	40.72	27.92	29.52	49.7	27.41	22.53	28.02	12.36	26.49	4	13.96	838.69
WT4	M	58.17	60.09	18.2	31.28	19.77	12.48	21.32	7.58	23.47	13.96	8.03	11.69	8.32	31.46	4	15.01	1000.61
WT5	M	37.74	36.58	22.17	12.28	23.04	11.19	20.65	15.49	9.29	9.39	5.56	50.9	41.86	25.83	4	12.07	824.19
WT6	M	49.19	33.29	23.87	19.72	10.4	14.61	15.81	18.81	10.98	27.36	8.4	53.13	33.4	24.15	5	12.57	853.51
WT7	M	55.95	54.53	22.23	25.08	42.67	19.43	13	23.24	60.09	31.7	15.5	20.47	7.23	20.72	5	16.59	1091.77
WT8	M	57.7	52.67	22.71	17.04	13.3	17.57	18.3	17.13	55.96	20.38	11.94	18.96	6.51	35.43	4	23.7	1246.91
WT9	M	60.09	40.75	37.73	58.17	48.67	39.55	9.01	28.35	38.37	52.46	54.97	13.41	11.72	31.83	3	17.46	1047.35
WT10	M	31.09	60.09	58.74	29.55	32.12	36.51	18.89	25.68	17.91	27.22	16.32	20.75	16.71	19.09	3	19.09	1145.42
WT11	M	57.88	60.09	50.99	48.12	41.18	32.02	15.61	16.23	60.09	55.28	54.82	11.93	7.97	47.05	8	12.93	776.3
WT12	M	56.54	60.09	36.29	49.47	19.89	28.14	14.98	10.51	36.16	26.21	15.95	8.95	7.12	34.1	6	16.14	968.17
WT13	M	60.09	57.64	53.85	46.85	49.54	49.56	41.59	44.75	60.09	45.82	30.04	8.37	5.51	16.75	1	17.51	1045.51
KO1	M	60.09	50.66	60.09	51.39	54.61	46.44	30.09	28.16	33.35	7.42	4.16	16.16	8.16	19.15	2	14.7	882.69
KO2	M	60.09	60.09	60.09	60.09	41.65	31.84	40.85	30.09	44.15	31.93	24.03	30.06	19.04	12.71	2	6.92	415.54
KO3	M	58.81	60.09	47.99	60.09	54.37	23.65	25.98	35.02	27.5	40.32	19.69	13.36	12.58	16.52	2	16.84	1011.26
KO4	M	57.82	51.87	29.7	30.49	17.47	29.6	21.71	10.29	42.33	22.61	10.7	20.87	6.5	29.1	4	14.06	945.03
KO5	M	48.63	37.85	27.34	16.46	27.31	19.88	18.26	10.89	26.17	12.4	6.59	54.27	18.44	30.06	1	10.18	709.43
KO6	M	46.29	20.16	10.15	9.77	9.39	11.38	11.12	20.2	10.45	11.74	6.97	25.38	10.44	22.32	2	19.36	1263.5
KO7	M	54.73	44.04	33.31	33.45	22.84	24.27	24.56	20.19	32.31	22.09	13.9	25.44	11.99	21.38	2	13.45	874.69
KO8	M	60.09	60.09	60.09	49.21	52.45	47.55	30.43	17.8	50.9	41.37	48.07	12.4	6.31	31.93	3	17.54	1046.94
KO9	M	49.05	60.09	60.09	60.09	50.96	12.23	21.3	10.44	60.09	51.49	42.02	13	6.88	6.74	1	17.35	1041.95

## Sheet: 7D
Genotype	Sex	D1	D2	D3	D4	D5	D6	D7	D8	R1	R2	R3	V1	V2	Probe Target Quad Time	Probe Target Platform Crossings	Velocity	Distance
WT1	F	55.64	48.87	9.31	16.83	25.03	20.03	27.54	21.63	28.45	23.74	21.22	16.97	7.67	31.2	4	22.24	1335.51
WT2	F	57.45	60.08	19.36	16.26	23.71	21.51	25.04	14.02	32.29	11.2	15.74	16.73	7.06	26.93	4	20.95	1257.76
WT3	F	55.95	54.53	22.23	25.08	32.67	19.43	13	23.24	60.09	31.7	15.5	20.47	7.23	39.77	1	11.41	558.79
WT4	F	54.15	50.19	46.31	21.07	24.68	12.46	17.87	29.22	20.83	11.34	10.5	53.76	7.89	26.29	4	12.62	858.72
WT5	F	28.86	35.53	34.16	38.47	25.1	18.54	18.98	21.83	29.23	13.51	10.8	31.93	29.1	25.63	4	13.65	920.71
WT6	F	47.69	29.63	42.98	39.66	25.68	18.95	20.3	30.2	23.67	12.31	9.17	38.3	33.83	22.62	5	6.85	512.22
WT7	F	42.18	22.48	26.99	11.08	25.12	13.15	19.27	14.86	27.8	7.31	7.09	46.41	37.14	32.93	4	13.36	893.89
WT8	F	42.13	18.11	48.42	29.74	21.47	10.25	15.67	9.14	40.96	6.95	5.48	59.68	40.07	40.24	7	13.65	916.53
WT9	F	60.09	60.09	35.19	32.34	30.99	58.16	17.99	13.17	33.84	18.9	25.19	19.18	12.19	36.94	8	13.23	794.48
WT10	F	60.09	53.33	40.53	39.77	37.13	27.17	26.45	30.25	31.97	43.12	20.93	20.59	8.82	21.12	1	13.45	807.93
WT11	F	60.09	60.09	21.32	50.53	47.88	21.6	23.92	25.61	25.03	23.73	19.06	16.54	6.35	25.19	3	16.44	987.21
WT12	F	60.09	60.09	60.09	59.73	60.09	41.05	21.8	58.82	60.09	41.32	35.97	3.62	9.58	28.36	3	14.45	866.74
KO1	F	53.9	53.24	44.62	37.94	49.52	27.75	29.12	25.3	17.04	34.48	22.28	19.82	12.95	16.08	3	11.91	815.07
KO2	F	60.09	51.21	46.37	32.7	24.52	20.32	16.01	13.19	44.83	31.13	21.59	26.34	7.36	18.99	4	11.5	668.15
KO3	F	52.43	39.03	46.18	30.91	31.44	24.57	38.57	19	50.9	50.38	15.14	18.79	10.97	10.54	2	10.67	741.17
KO4	F	60.02	31.02	49.09	30.75	27.12	31.21	30.78	31.96	20.98	35.25	23.68	19.73	14.11	10.34	2	12.88	874.38
KO5	F	57.87	47.36	37.88	35.48	28.63	34.17	18.39	23.74	60.09	33.68	15.16	22.37	9.43	32.5	4	14.27	957.45
KO6	F	30.11	31.88	33.88	49.3	37.14	26.93	26.23	37.02	21.72	9.7	7.51	28.71	13.66	17.38	3	8.18	592.19
KO7	F	59.78	60.09	36.17	32.45	27.76	20.29	15.06	23.56	36.97	18.66	5.57	55.64	30.57	24.46	3	18.38	1204.23
KO8	F	33.64	38.08	34.88	33.89	33.98	20.95	25.88	22.9	18.13	13.17	6.26	38.72	10.58	15.65	2	17.54	1152.49
KO9	F	60.05	60.05	60.04	60.09	49.19	24.63	38.14	12.92	53.72	36.68	36.8	10.19	6.17	11.01	1	15.53	925.75
KO10	F	53.33	57.79	36.23	47.52	38.52	27.56	13.64	13.08	60.09	60.07	47.8	11.82	10.52	28.86	3	22.32	1339.3
KO11	F	60.09	60.06	60.09	49.93	22.47	30.82	36.48	32.55	21.55	22.26	15.4	32.77	21.19	16.45	2	21.1	1266.13
KO12	F	32.54	60.09	37.49	34.02	56.6	42.79	22.77	24.08	43.73	47.85	33.51	9.56	7.02	34.67	1	15.36	922.81

## Sheet: 7E
Genotype	Sex	Training Pre-CS Freezing %	Training Freezing CS1 %	Training Freezing CS2 %	Context 24 h Freezing %	Cued 24 h Pre-CS Freezing %	Cued 24 h Freezing CS1 %	Cued 24 h Freezing CS2 %
WT1	M	4.67	35.71	30.36	36.05	21.78	66.37	68.14
WT2	M	3.74	19.63	57.89	5	0.45	45.95	59.36
WT3	M	0.45	46.73	26.5	14.7	0.45	34.85	69.99
WT4	M	0	14.41	32.88	18.29	0.89	65.76	81.2
WT5	M	0	26.86	60.55	26.05	1.11	45.4	78.38
WT6	M	0	39.41	48.48	54.88	1.78	47.96	73.59
WT7	M	0	0	30.91	41.32	1.77	31.17	75.68
WT8	M	1.35	24.25	9.01	20.46	0.88	54.27	65.08
WT9	M	0	2.7	10.74	13.05	0.44	71.27	71.41
WT10	M	0	0	39.19	35.32	3.11	78.45	85.59
WT11	M	0	16	30.2	29.07	0.44	41.01	58.84
KO1	M	0	15.18	12.5	9.94	0.45	40.71	58.41
KO2	M	0	3.6	1.8	2.88	5.56	9.7	7.09
KO3	M	0	1.75	27.57	3.9	3.16	60.6	73.31
KO4	M	0	0	17.07	15.27	0.44	46.21	45.33
KO5	M	0.44	42.72	77.48	14.26	29.52	36.16	81.08
KO6	M	0	0	0	6.05	0.45	48.74	59.22
KO7	M	0	17.69	68.47	24.88	0.44	33.66	58.94
KO8	M	0	36.39	73.68	39.99	6.44	14.27	57.71
KO9	M	0	1.75	18.66	6.65	2.67	41.8	50.09
KO10	M	0.9	23.17	43.72	9.73	5.13	58.84	68.85
KO11	M	0	19.63	34.26	25.52	2.19	53.44	72.97

## Sheet: 7F
Genotype	Sex	Training Pre-CS Freezing %	Training Freezing CS1 %	Training Freezing CS2 %	Context 24 h Freezing %	Cued 24 h Pre-CS Freezing %	Cued 24 h Freezing CS1 %	Cued 24 h Freezing CS2 %
WT1	F	0.44	0	24.11	37.69	1.78	54.87	38.94
WT2	F	0	30.36	71.43	48.93	5.12	40.71	38.94
WT3	F	0	12.5	46.43	17.7	15.38	53.1	87.5
WT4	F	2.23	34.51	75	25.4	0.45	70.8	87.5
WT5	F	3.55	54.87	23.01	22.64	1.34	42.86	66.07
WT6	F	0.88	5.31	25.15	9.69	1.11	36.65	60.2
WT7	F	0.68	33.78	45.73	5.15	1.58	59.53	84.02
WT8	F	2.48	3.51	48.84	20.62	3.12	23.73	73.59
WT9	F	0.66	11.57	43.86	25.39	2.65	83.83	84.68
WT10	F	0	0	0	20.44	1.34	25.94	41.02
WT11	F	0	0	14.41	35.89	1.77	54.34	71.17
WT12	F	0	0	14.41	47.31	10.25	37.46	71.41
WT13	F	0	0	27.93	62.33	43.82	64.27	87.72
WT14	F	0	11.71	62.16	28.65	2.03	55.95	85.09
KO1	F	1.34	31.86	53.1	14.96	2.67	65.18	68.75
KO2	F	0	67.26	83.04	32.62	26.71	53.98	62.32
KO3	F	1.56	1.79	17.86	5.43	0.45	34.51	30.09
KO4	F	0	2.68	56.25	23.31	5.1	53.1	34.82
KO5	F	0	8.06	8.82	3.3	1.58	7.02	11.47
KO6	F	0	2.7	17.76	2.83	5.63	43.24	61.85
KO7	F	0	0	26.69	4.1	0.45	52.35	38.03
KO8	F	0	41.89	69.75	3.03	Data corruption
KO9	F	0	0	7.11	9.92	0.45	21.2	54.08
KO10	F	0.45	10.74	27.64	6.83	0.44	36.63	61.9
KO11	F	0	7.21	41.87	54.36	2.23	45.23	81.11
