# Supplementary material for: Isoform-specific roles for AKT in affective behavior, spatial memory, and extinction related to psychiatric disorders
Source: eLife. 2020 Dec 16;9:e56630. doi: 10.7554/eLife.56630 (PMC7787664; doi:10.7554/eLife.56630)
Supplement: Figure 8—source data 1. [file elife-56630-fig8-data1.xlsx]

## Sheet: 8A
Genotype	Sex	AKT1/GAPDH	pAKT1/AKT1
WT1	M	90.62	100.93
WT2	M	84.55	92.54
WT3	M	110.97	102.37
WT4	M	113.85	104.17
WT5	M	83.99	113.08
WT6	M	99.01	125.17
WT7	M	94.95	102.06
WT8	M	111.16	108.96
WT9	M	108.42	69.58
WT10	M	102.47	81.14
WT1	F	88.35	100.86
WT2	F	94.63	91.35
WT3	F	85.51	91.78
WT4	F	95.16	95.65
WT5	F	108.16	103.88
WT6	F	88.37	118.6
WT7	F	89.73	122.43
WT8	F	91.2	110.44
WT9	F	110.21	97.19
WT10	F	110.52	84.8
WT11	F	115.93	85.09
Genotype	Sex	AKT2/GAPDH	pAKT2/AKT2
WT1	M	104.5	62.27
WT2	M	85.74	71.95
WT3	M	95.2	147.69
WT4	M	114.56	118.09
WT5	M	84.84	108.6
WT6	M	113.25	75.85
WT7	M	101.91	115.55
WT8	M	87.82	95.25
WT9	M	108.1	101.37
WT10	M	104.07	103.38
WT1	F	117.76	66.99
WT2	F	95.7	40.56
WT3	F	110.68	136.93
WT4	F	113.41	103.84
WT5	F	131.93	106.14
WT6	F	108.99	84.89
WT7	F	120.6	112.13
WT8	F	122.96	104.63
WT9	F	96.85	113.21
WT10	F	130.07	107.44
WT11	F	118.41	81.26
Genotype	Sex	AKT3/GAPDH
WT1	M	118.23
WT2	M	85.48
WT3	M	103.1
WT4	M	93.18
WT5	M	96.67
WT6	M	109.75
WT7	M	105.17
WT8	M	96.41
WT9	M	92.01
WT1	F	96.52
WT2	F	93.99
WT3	F	86.11
WT4	F	87.52
WT5	F	92.47
WT6	F	90.19
WT7	F	100.76
WT8	F	102.06
WT9	F	97.54
WT10	F	114.38
Genotype	Sex	pan-AKT/GAPDH	pan-pAKT/AKT
WT1	M	103.74	39.17
WT2	M	97.33	86.76
WT3	M	91.46	153.4
WT4	M	107.47	120.68
WT5	M	106.7	103.4
WT6	M	97.83	93.78
WT7	M	95.47	102.82
WT8	M	114.01	83.89
WT9	M	89.96	115
WT10	M	96.03	101.11
WT1	F	93.27	68.49
WT2	F	100.78	70.36
WT3	F	99.84	141.11
WT4	F	106.28	100.87
WT5	F	108.88	124.59
WT6	F	107.11	109.11
WT7	F	87.01	134.5
WT8	F	103.44	96.54
WT9	F	96.65	103.71
WT10	F	86.66	117.72
WT11	F	103.12	75.97

## Sheet: 8B
Akt1
Genotype	pan-AKT/GAPDH	pan-pAKT/AKT
WT1	103.74	39.17
WT2	97.33	86.76
WT3	91.46	153.4
WT4	107.47	120.68
WT5	81.59	84.36
WT6	134.24	83.36
WT7	84.17	132.28
KO1	76.5	140.09
KO2	64.05	199.02
KO3	66.7	194.18
KO4	74.02	170.71
KO5	91.65	353.86
KO6	53.21	76.52
KO7	77.95	187.92
Akt2
Genotype	pan-AKT/GAPDH	pan-pAKT/AKT
WT1	95.12	78.03
WT2	90.99	82.12
WT3	103.72	103.18
WT4	106.95	104.51
WT5	103.23	132.16
WT6	95.35	97.75
WT7	104.65	102.25
KO1	83.99	90.83
KO2	80.01	67.19
KO3	93.73	72.13
KO4	100.17	92.38
KO5	96.84	110.82
KO6	99.21	95.42
KO7	84.19	96.31
Akt3
Genotype	pan-AKT/GAPDH	pan-pAKT/AKT
WT1	99.83	104.74
WT2	97.25	94.4
WT3	92.89	105.99
WT4	103.48	111.9
WT5	106.55	82.98
KO1	57.89	136.68
KO2	61.22	77.47
KO3	60.95	108.54
KO4	70.05	82.48
KO5	57.99	107.93

## Sheet: 8C
Akt1
Genotype	pan-AKT/GAPDH	pan-pAKT/AKT
WT1	91.62	67.75
WT2	98.99	69.61
WT3	98.06	139.6
WT4	104.39	99.79
WT5	106.94	123.26
WT6	79.57	76
WT7	122.81	57.52
WT8	97.63	166.48
KO1	86.78	211.74
KO2	69.39	139.22
KO3	94.12	178.82
KO4	84.14	167.41
KO5	80.93	122.29
KO6	85.97	115.13
KO7	56.88	191.5
KO8	63.82	219.12
Akt2
Genotype	pan-AKT/GAPDH	pan-pAKT/AKT
WT1	87.67	135.03
WT2	102.66	63.83
WT3	104.34	107.8
WT4	105.32	93.35
WT5	100.3	109.54
WT6	99.7	90.46
KO1	82.81	100.32
KO2	82.34	82.99
KO3	87.15	75.4
KO4	95.79	86.67
KO5	84.49	106.81
KO6	105.52	119.26
Akt3
Genotype	pan-AKT/GAPDH	pan-pAKT/AKT
WT1	96.54	103.77
WT2	98.12	93.62
WT3	99.04	79.54
WT4	106.3	123.08
KO1	56.6	63.15
KO2	56.55	117.02
KO3	61.76	76.46
KO4	69	82.97
KO5	63.76	197.31

## Sheet: 8D
Genotype	Sex	pAKT2/AKT2
WT1	M	31.21
WT2	M	60.15
WT3	M	131.99
WT4	M	176.65
WT5	M	78.78
WT6	M	101.92
WT7	M	119.3
KO1	M	187.65
KO2	M	207.97
KO3	M	197.49
KO4	M	178.2
KO5	M	323.41
KO6	M	66.32
KO7	M	166.42
WT1	F	93.86
WT2	F	25.96
WT3	F	136.48
WT4	F	113.37
WT5	F	130.33
WT6	F	68.57
WT7	F	45.92
WT8	F	185.51
KO1	F	137.18
KO2	F	103.61
KO3	F	225.52
KO4	F	212.49
KO5	F	115.09
KO6	F	87.07
KO7	F	199.08
KO8	F	175.62

## Sheet: 8E
Genotype	Sex	pAKT1/AKT1
WT1	M	101.34
WT2	M	96.97
WT3	M	94.26
WT4	M	118.75
WT5	M	88.68
KO1	M	173.18
KO2	M	140.84
KO3	M	134.43
KO4	M	122.69
KO5	M	111.3
WT1	F	93.41
WT2	F	106.95
WT3	F	85.13
WT4	F	114.51
WT5	F	96.34
WT6	F	98.63
WT7	F	107.59
WT8	F	97.43
KO1	F	113.6
KO2	F	141.52
KO3	F	111.1
KO4	F	122.7
KO5	F	184.65
KO6	F	139.29
KO7	F	225.24
KO8	F	182.94
KO9	F	145.53
