# Supplementary material for: Isoform-specific roles for AKT in affective behavior, spatial memory, and extinction related to psychiatric disorders
Source: eLife. 2020 Dec 16;9:e56630. doi: 10.7554/eLife.56630 (PMC7787664; doi:10.7554/eLife.56630)
Supplement: Figure 9—source data 1. [file elife-56630-fig9-data1.xlsx]

## Sheet: 9A
Genotype	pPDK1/PDK1	PDK1/GAPDH
WT1	126.9	90.08
WT2	73.1	109.92
WT3	112.86	90.59
WT4	93.51	96.44
WT5	93.63	112.97
WT6	99.63	91.86
WT7	100.37	108.14
KO1	142.37	87.78
KO2	67.33	104.54
KO3	89.63	92.81
KO4	96.8	89.57
KO5	79.02	117.07
KO6	99.93	102.66
KO7	158.09	101.68
Genotype	pGSK3/GSK3	GSK3/GAPDH
WT1	103.13	110.03
WT2	80.82	104.49
WT3	116.04	85.48
WT4	105.83	107.75
WT5	94.17	92.25
WT6	109.71	74.85
WT7	90.29	125.15
KO1	122.87	103.68
KO2	92.38	97.23
KO3	123.89	90.86
KO4	76.86	104.25
KO5	143.46	81.5
KO6	88.87	106.73
KO7	112.17	137.72
Genotype	pERK/ERK	ERK/GAPDH
WT1	142.37	110.34
WT2	57.63	89.66
WT3	101.88	112.33
WT4	96.74	95.41
WT5	101.38	92.26
WT6	133.38	101.42
WT7	66.62	98.58
KO1	116.97	117.72
KO2	76.84	89.65
KO3	44.23	91
KO4	124.62	97.85
KO5	135.49	103.98
KO6	91.76	108.57
KO7	59.13	89.73

## Sheet: 9B
Genotype	pPDK1/PDK1	PDK1/GAPDH
WT1	130.28	102.61
WT2	100.59	90.91
WT3	107.57	101.03
WT4	88.37	95.8
WT5	73.19	109.64
WT6	103.03	102.09
WT7	96.97	97.91
KO1	67.94	100.83
KO2	137.55	96.3
KO3	114.42	117.77
KO4	66.87	112.4
KO5	83.19	81.64
KO6	101.66	108.33
KO7	83.98	114.37
Genotype	pGSK3/GSK3	GSK3/GAPDH
WT1	195.45	80.65
WT2	55.17	120.91
WT3	49.38	98.44
WT4	95.46	92.18
WT5	104.54	107.82
WT6	107.4	103.53
WT7	92.6	96.47
KO1	140.36	88.49
KO2	31.83	125.6
KO3	52.85	94.61
KO4	114.35	99.26
KO5	101.71	122.37
KO6	87.78	110.31
KO7	109.57	113.39
Genotype	pERK/ERK	ERK/GAPDH
WT1	141.37	139.49
WT2	77.33	102
WT3	112.61	89.46
WT4	132.31	87.9
WT5	36.39	81.16
WT6	111.06	94.16
WT7	88.94	105.84
KO1	101.69	116.32
KO2	165.7	102.48
KO3	117.41	86.15
KO4	92.45	101.21
KO5	58.39	82.15
KO6	86.23	131.85
KO7	160.87	103.25

## Sheet: 9C
Genotype	pPDK1/PDK1	PDK1/GAPDH
WT1	116.07	82
WT2	95.5	75.11
WT3	116.87	102.67
WT4	94.42	114.01
WT5	92.83	112.16
WT6	84.3	114.06
KO1	129.68	86.13
KO2	79.28	74.46
KO3	76.36	105.11
KO4	95.35	110
KO5	86.54	131.2
KO6	98.42	105.6
Genotype	pGSK3/GSK3	GSK3/GAPDH
WT1	107.2	63.08
WT2	81.48	113.77
WT3	111.32	123.15
WT4	82.26	109.26
WT5	117.74	90.74
WT6	104.91	102.02
WT7	90.66	93.15
WT8	104.43	104.83
KO1	109.59	90.48
KO2	50.32	167.81
KO3	117.22	125.04
KO4	142.51	88.09
KO5	120.41	94.27
KO6	80.94	103.42
KO7	120.81	95.39
KO8	96.88	109.49
Genotype	pERK/ERK	ERK/GAPDH
WT1	139.24	84.35
WT2	105.08	100.99
WT3	121.34	73.99
WT4	85.91	109.36
WT5	86.13	102.64
WT6	62.3	128.67
KO1	147.25	83.54
KO2	76.52	120.53
KO3	94.06	116.16
KO4	124.16	95.2
KO5	87.44	128.03
KO6	66.6	120.07

## Sheet: 9D
Genotype	pPDK1/PDK1	PDK1/GAPDH
WT1	91.38	103.75
WT2	109.63	97.15
WT3	105.65	101.77
WT4	110.77	89.92
WT5	99.02	94.94
WT6	83.55	112.47
KO1	91.46	97.33
KO2	79.83	102.61
KO3	117.83	103.8
KO4	98.35	86.79
KO5	76.26	113.9
KO6	86.64	93.39
Genotype	pGSK3/GSK3	GSK3/GAPDH
WT1	92.96	81.75
WT2	117.14	102.25
WT3	89.9	116
WT4	90.28	103.16
WT5	109.72	96.84
WT6	106.43	103.52
WT7	93.57	96.48
KO1	75.88	93.28
KO2	90.93	109.18
KO3	71.76	107.7
KO4	60.02	107.49
KO5	92.44	92.27
KO6	70.28	117.4
KO7	85.66	86.1
Genotype	pERK/ERK	ERK/GAPDH
WT1	108.61	116.68
WT2	141.29	77.23
WT3	148.73	87.1
WT4	65.47	97.99
WT5	46.93	126.75
WT6	88.97	94.25
KO1	120.34	104.94
KO2	138.42	84.71
KO3	105.81	97.73
KO4	37.89	93.26
KO5	91.89	98.42
KO6	90.07	95.83

## Sheet: 9E
Genotype	pPDK1/PDK1	PDK1/GAPDH
WT1	107.29	82.91
WT2	108.39	91.81
WT3	84.32	125.29
WT4	114.18	78.26
WT5	85.82	121.74
KO1	105.1	81.59
KO2	95.03	99.64
KO3	90.27	109.99
KO4	101.79	92.66
KO5	75.09	151
Genotype	pGSK3/GSK3	GSK3/GAPDH
WT1	50.6	101.23
WT2	85.64	107.06
WT3	163.76	91.71
WT4	146.75	89.54
WT5	53.25	110.46
KO1	48.69	99.31
KO2	68.22	109
KO3	106.16	108.85
KO4	110.81	97.35
KO5	86.7	111.63
Genotype	pERK/ERK	ERK/GAPDH
WT1	70.34	110.04
WT2	126.49	94.82
WT3	103.18	95.14
WT4	121.36	114.14
WT5	78.64	85.86
KO1	72.41	103.32
KO2	79.35	97.8
KO3	123.19	105.43
KO4	168.31	92.62
KO5	167.11	79.94

## Sheet: 9F
Genotype	pPDK1/PDK1	PDK1/GAPDH
WT1	107.47	118.48
WT2	101.7	96.26
WT3	90.83	85.26
WT4	88.55	115.93
WT5	111.45	84.07
KO1	104.88	128.4
KO2	85.8	90.21
KO3	87.85	94.02
KO4	77.64	151.66
KO5	117.18	76.26
Genotype	pGSK3/GSK3	GSK3/GAPDH
WT1	125.32	113.97
WT2	82.17	98.03
WT3	92.51	88.01
WT4	90.03	105.34
WT5	109.97	94.66
KO1	108.24	123.9
KO2	90.07	89.49
KO3	107.13	84.87
KO4	76.52	118.41
KO5	168.21	86.34
Genotype	pERK/ERK	ERK/GAPDH
WT1	95.56	115.17
WT2	109.84	77.02
WT3	94.6	107.81
WT4	110.63	86.5
WT5	89.37	113.5
KO1	87.26	86.86
KO2	107.32	89.91
KO3	106.97	92.16
KO4	101.18	96.23
KO5	121.79	117.14

## Sheet: 9-Supplement 2
Genotype	pGSK3/GSK3	GSK3/GAPDH
WT1	169.96	93.08
WT2	134.08	119.16
WT3	67.38	99.23
WT4	68.57	96.14
WT5	60.01	92.39
KO1	128.78	112.9
KO2	119.71	122.84
KO3	68.53	138.39
KO4	91.51	94.09
KO5	52.35	89.53

## Sheet: 9-Supplement 3B
Genotype	Sex	Cell Count
WT1	M	13.475
WT2	M	16.25
WT3	M	19.85
WT1	F	21.75
WT2	F	14.1
WT3	F	16.65

## Sheet: 9-Supplement 3C
Genotype	Sex	GAD67/β-actin
WT1	M	95.1831
WT2	M	99.2637
WT3	M	100.678
WT4	M	106.154
WT5	M	105.615
WT6	M	93.106
WT1	F	77.324
WT2	F	94.6999
WT3	F	96.4805
WT4	F	86.1608
WT5	F	114.676
WT6	F	71.5066
